# Supplementary material for: Copper-catalyzed tandem process: an efficient approach to 2-substituted-1,4-benzodioxanes
Source: Royal Society of Chemistry journal article supplement (doi:10.1039/c003691a), 2010-01-01

## Supporting Information

# Copper-Catalyzed Tandem Process: An Efficient Approach to 2-Substituted-1, 4-benzodioxanes

Yunyun Liu, Weiliang Bao\*

Department of Chemistry, Xi Xi Campus, Zhejiang University, Hangzhou, Zhejiang 310028, P. R. China

Fax: (+86) -571-88273814; E-mail: [wlbao@css.zju.edu.cn](mailto:wlbao@css.zju.edu.cn)

### Table of Contents

#### A. Experimental Procedure

**General Information** 2

**General Procedure for the Synthesis of 2-Substituted-1, 4-benzodioxanes** 2

B. Spectra Data 2-7

C. References 7

D. Copies of  $^1\text{H}$  NMR and  $^{13}\text{C}$  NMR spectra 8-24

## A. Experimental Procedure

**General Information.** All reactions were carried out in Schlenk tube and run under a N<sub>2</sub> atmosphere. All the copper sources, ligands and bases were commercially available. Organic solvents, also were commercially available, were dried over 4Å molecular sieves before used. 2-((2-iodophenoxy)methyl)oxirane were prepared according to the known literature.<sup>1</sup> Thin-layer chromatography (TLC) was carried out with 0.2 mm thick silica gel plates (GF 254) and visualized by UV light. All melting points are uncorrected. All products were confirmed by <sup>1</sup>H NMR, <sup>13</sup>C NMR. Unknown compounds were additionally confirmed by MS and HRMS. MS and HRMS were obtained using EI ionization. The NMR spectra were recorded in CDCl<sub>3</sub> on a 400 MHz instrument with TMS as internal standard. IR spectrums were taken in ATR apparatus.

**General Procedure for the Synthesis of 2-Substituted-1, 4-benzodioxanes.** A Schlenk tube was charged with CuBr (22 mg, 15% mol), 1,10-phenanthroline (57 mg, 30% mol), Cs<sub>2</sub>CO<sub>3</sub> (650 mg, 2 mmol), phenol (113 mg, 1.2 mmol), evacuated and backfilled with nitrogen. Then 2-((2-iodophenoxy)methyl)oxirane (276 mg, 1.0 mmol), DMA (2 mL) were successively added. The reaction tube was quickly sealed and the contents were stirred at 120 °C for 48 h. Then the cooled reaction mixture was dissolved in H<sub>2</sub>O and extracted with Et<sub>2</sub>O. The combined organic layer was dried (MgSO<sub>4</sub>). The product was further purified by column chromatography (silica gel, PE-EtOAc).

## B. Spectra Data

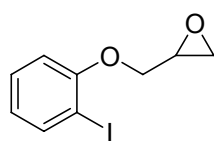

2-((2-iodophenoxy)methyl)oxirane (**1a**): Oil, <sup>1</sup>H NMR (400MHz, CDCl<sub>3</sub>): δ 7.76-7.74 (m, 1H), 7.29-7.24 (m, 1H), 6.83-6.81 (m, 1H), 6.73-6.69 (m, 1H), 4.28-4.25 (m, 1H), 4.04-4.00 (m, 1H), 3.37-3.36 (m, 1H), 2.90-2.87 (m, 2H). <sup>13</sup>C NMR (100 MHz, CDCl<sub>3</sub>): δ 156.98, 139.52, 129.55, 123.12, 112.56, 86.62, 69.27, 50.13, 44.74.

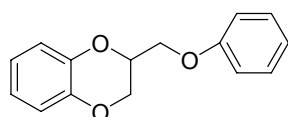

2-phenoxyethyl-2,3-dihydrobenzo[1,4]dioxin (**3a**): White solid, m.p. 35-36°C<sup>2</sup>; <sup>1</sup>H NMR (400MHz, CDCl<sub>3</sub>): δ 7.33 (t, *J* = 7.6 Hz, 2H), 7.02 (t, *J* = 7.6 Hz, 1H), 6.96-6.90 (m, 6H), 4.59-4.56 (m, 1H), 4.43 (dd, *J* = 1.4, 11.4Hz, 1H), 4.30-4.22 (m, 2H), 4.19-4.15

(m, 1H);  $^{13}\text{C}$  NMR (100 MHz,  $\text{CDCl}_3$ ):  $\delta$  158.26, 143.18, 142.91, 129.55, 121.74, 121.53, 121.40, 117.40, 117.25, 114.56, 71.34, 66.24, 65.34; IR:  $\nu$  = 3019, 2930, 2882, 1578, 1493, 1269, 1237, 1076, 745, 689  $\text{cm}^{-1}$ .

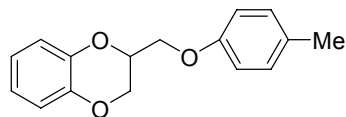

2-(p-tolyloxymethyl)-2,3-dihydrobenzo[1,4]dioxine (**3b**): White

solid, m.p. 56-57°C;  $^1\text{H}$  NMR (400MHz,  $\text{CDCl}_3$ ):  $\delta$  7.11 (d,  $J$  = 8.4Hz, 2H), 6.96-6.92 (m, 2H), 6.89-6.84 (m, 4H), 4.58-4.54 (m, 1H), 4.43-4.40 (m, 1H), 4.26-4.19 (m, 2H), 4.15-4.10 (m, 1H), 2.32 (s, 3H);  $^{13}\text{C}$  NMR (100 MHz,  $\text{CDCl}_3$ ):  $\delta$  156.22, 143.22, 142.96, 130.67, 130.00, 121.73, 121.52, 117.42, 117.26, 114.45, 71.41, 66.47, 65.39, 20.47; IR:  $\nu$  = 3034, 2947, 2922, 2882, 1591, 1492, 235, 1041, 842, 739  $\text{cm}^{-1}$ ; EI-MS:  $m/z$  = 256 ( $\text{M}^+$ ); HRMS (EI) calcd for  $\text{C}_{16}\text{H}_{16}\text{O}_3$  256.1099, found 256.1100.

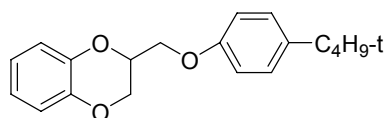

2-((4-tert-butylphenoxy)methyl)-2,3-dihydrobenzo[1,4]dioxine

(**3c**): White solid, m.p. 59-60°C;  $^1\text{H}$  NMR (400MHz,  $\text{CDCl}_3$ ):  $\delta$  7.34 (d,  $J$  = 7.6 Hz, 2H), 6.95-6.87 (m, 6H), 4.59-4.55 (m, 1H), 4.43-4.40 (m, 1H), 4.28-4.20 (m, 2H), 4.17-4.12 (m, 1H), 1.33 (s, 9H);  $^{13}\text{C}$  NMR (100 MHz,  $\text{CDCl}_3$ ):  $\delta$  156.02, 144.14, 143.19, 142.92, 126.33, 121.71, 121.49, 117.38, 117.24, 114.03, 71.35, 66.32, 65.40, 34.09, 31.49; IR:  $\nu$  = 3053, 2958, 2932, 2901, 2875, 1592, 1493, 1267, 1030, 841, 744  $\text{cm}^{-1}$ ; EI-MS:  $m/z$  = 298 ( $\text{M}^+$ ); HRMS (EI) calcd for  $\text{C}_{19}\text{H}_{22}\text{O}_3$  258.1569, found 298.1566.

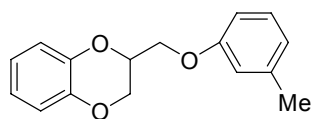

2-(m-tolyloxymethyl)-2,3-dihydrobenzo[1,4]dioxine (**3d**): Oil;  $^1\text{H}$

NMR (400MHz,  $\text{CDCl}_3$ ):  $\delta$  7.15 (t,  $J$  = 8.0Hz, 1H), 6.92-6.88 (m, 2H), 6.85-6.82 (m, 2H), 6.78 (d,  $J$  = 7.8Hz, 1H), 6.74-6.70 (m, 2H), 4.54-4.50 (m, 1H), 4.38-4.35 (m, 1H), 4.23-4.15 (m, 2H), 4.11-4.07 (m, 1H), 2.31 (s, 3H);  $^{13}\text{C}$  NMR (100 MHz,  $\text{CDCl}_3$ ):  $\delta$  158.31, 143.22, 142.95, 139.66, 129.31, 122.23, 121.74, 121.53, 117.42, 117.26, 115.44, 111.44, 71.37, 66.20, 65.37, 21.49; IR:  $\nu$  = 3048, 2977, 2921, 1590, 1490, 1248, 1043, 848, 780, 745  $\text{cm}^{-1}$ ; EI-MS:  $m/z$  = 256 ( $\text{M}^+$ ). HRMS (EI) calcd for  $\text{C}_{16}\text{H}_{16}\text{O}_3$  256.1099, found 256.1101.

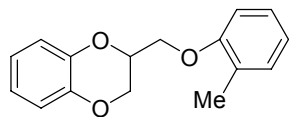

2-(o-tolylloxymethyl)-2,3-dihydrobenzo[1,4]dioxine (**3e**): Oil;  $^1\text{H}$  NMR

(400MHz,  $\text{CDCl}_3$ ):  $\delta$  7.20-7.16 (m, 2H), 6.96-6.92 (m, 3H), 6.90-6.84 (m, 3H), 4.62-4.58 (m, 1H), 4.46 (dd,  $J = 1.6, 11.4$  Hz, 1H), 4.31-4.24 (m, 2H), 4.20-4.16 (m, 1H), 2.26 (s, 3H);  $^{13}\text{C}$  NMR (100 MHz,  $\text{CDCl}_3$ ):  $\delta$  156.35, 143.21, 143.03, 130.84, 126.91, 126.86, 121.72, 121.50, 121.10, 117.35, 117.24, 111.04, 71.42, 66.35, 65.51, 16.15; IR:  $\nu = 3053, 2923, 2882, 1592, 1491, 1239, 1044, 743$   $\text{cm}^{-1}$ .

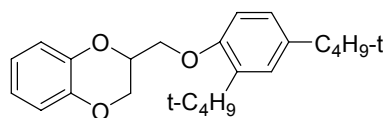

2-((2,4-di-tert-butylphenoxy)methyl)-2,3-dihydrobenzo[1,4]dioxine (**3f**): Oil;  $^1\text{H}$  NMR (400MHz,  $\text{CDCl}_3$ ):  $\delta$  7.34 (s, 1H), 7.18 (d,  $J = 8.4$  Hz, 1H), 6.90-6.86 (m, 4H), 6.80 (d,  $J = 8.4$  Hz, 1H), 4.62-4.60 (m, 1H), 4.48-4.45 (m, 1H), 4.27-4.19 (m, 3H), 1.40 (s, 9H), 1.30 (s, 9H);  $^{13}\text{C}$  NMR (100 MHz,  $\text{CDCl}_3$ ):  $\delta$  154.64, 143.30, 143.15, 142.95, 137.30, 124.10, 123.39, 121.73, 121.45, 117.39, 117.16, 111.22, 71.50, 66.28, 65.79, 35.01, 34.27, 31.53, 29.90; IR:  $\nu = 3057, 2961, 2857, 2878, 1591, 1493, 1235, 1061, 811, 749$   $\text{cm}^{-1}$ ; EI-MS:  $m/z = 354$  ( $\text{M}^+$ ); HRMS (EI) calcd for  $\text{C}_{23}\text{H}_{30}\text{O}_3$  354.2195, found 354.2204.

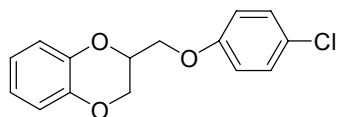

2-((4-chlorophenoxy)methyl)-2,3-dihydrobenzo[1,4]dioxine (**3g**):

White solid, m.p. 81-82°C;  $^1\text{H}$  NMR (400MHz,  $\text{CDCl}_3$ ):  $\delta$  7.23 (d,  $J = 8.4$  Hz, 2H), 6.89 (t,  $J = 4.8$  Hz, 2H), 6.86-6.83 (m, 4H), 4.56-4.51 (m, 1H), 4.39-4.36 (m, 1H), 4.22-4.17 (m, 2H), 4.13-4.09 (m, 1H);  $^{13}\text{C}$  NMR (100 MHz,  $\text{CDCl}_3$ ):  $\delta$  157.04, 143.20, 142.61, 129.40, 126.37, 121.79, 121.57, 117.35, 117.24, 115.84, 71.22, 66.61, 65.15; IR:  $\nu = 3076, 3042, 2924, 2886, 2852, 1588, 1492, 1240, 1043, 853, 753$   $\text{cm}^{-1}$ ; EI-MS:  $m/z = 276$  ( $\text{M}^+$ ); HRMS (EI) calcd for  $\text{C}_{15}\text{H}_{13}\text{ClO}_3$  276.0553, found 276.0559.

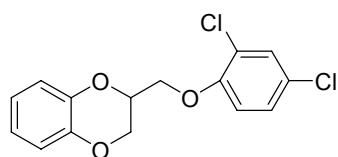

2-((2,4-dichlorophenoxy)methyl)-2,3-dihydrobenzo[1,4]dioxine (**3h**):

White solid, m.p. 70-71°C;  $^1\text{H}$  NMR (400MHz,  $\text{CDCl}_3$ ):  $\delta$  7.37 (s, 1H), 7.18 (d,  $J = 8.4$  Hz, 1H), 6.92-6.85 (m, 5H), 4.61-4.59 (m, 1H), 4.45-4.42 (m, 1H), 4.31-4.26 (m, 2H), 4.20-4.16 (m,

1H);  $^{13}\text{C}$  NMR (100 MHz,  $\text{CDCl}_3$ ):  $\delta$  152.72, 143.09, 142.70, 130.12, 127.62, 126.67, 124.11, 121.81, 121.63, 117.34, 117.30, 114.56, 71.05, 67.59, 65.05; IR:  $\nu$  = 3087, 2962, 2935, 2891, 1593, 1490, 1243, 1038, 834, 748  $\text{cm}^{-1}$ ; EI-MS:  $m/z$  = 310( $\text{M}^+$ ); HRMS (EI) calcd for  $\text{C}_{15}\text{H}_{12}\text{Cl}_2\text{O}_3$  310.1063, found 310.0170.

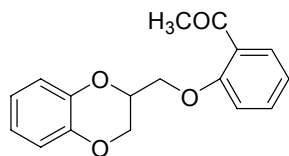

2-((2-acetylphenoxy)methyl)-2,3-dihydrobenzo[1,4]dioxine (**3i**): Oil;  $^1\text{H}$  NMR (400MHz,  $\text{CDCl}_3$ ):  $\delta$  7.72 (d,  $J$  = 7.6 Hz, 1H), 7.44 (t,  $J$  = 7.6Hz, 1H), 7.02 (t,  $J$  = 7.6Hz, 1H), 6.94 (d,  $J$  = 8.4Hz, 1H), 6.90-6.84 (m, 4H), 4.63-4.59 (m, 1H), 4.41-4.38 (m, 1H), 4.33-4.20 (m, 3H), 2.63 (s, 3H);  $^{13}\text{C}$  NMR (100 MHz,  $\text{CDCl}_3$ ):  $\delta$  199.42, 157.35, 142.96, 142.61, 133.60, 130.53, 128.63, 121.92, 121.67, 121.39, 117.36, 117.28, 112.44, 71.19, 66.95, 65.16, 31.88; IR:  $\nu$  = 3072, 2985, 2925, 2886, 1663, 1597, 1493, 1234, 1045, 831, 752  $\text{cm}^{-1}$ ; EI-MS:  $m/z$  = 284( $\text{M}^+$ ); HRMS (EI) calcd for  $\text{C}_{17}\text{H}_{16}\text{O}_4$  284.1049, found 284.1050.

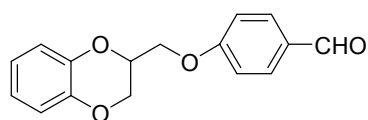

2-((4-formylphenoxy)methyl)-2,3-dihydrobenzo[1,4]dioxine (**3j**): White solid, m.p. 60-61 $^{\circ}\text{C}^2$ ;  $^1\text{H}$  NMR (400MHz,  $\text{CDCl}_3$ ):  $\delta$  9.89 (s 1H), 7.85 (d,  $J$  = 8.0Hz, 2H), 7.04 (d,  $J$  = 8.0Hz, 2H), 6.92-6.87 (m, 4H), 4.62-4.58 (m, 1H), 4.41-4.38 (m, 1H), 4.34-4.30 (m, 1H), 4.26-4.22 (m, 2H);  $^{13}\text{C}$  NMR (100 MHz,  $\text{CDCl}_3$ ):  $\delta$  190.71, 163.11, 143.00, 142.63, 131.97, 130.46, 121.89, 121.68, 117.38, 117.30, 114.81, 71.06, 66.46, 64.97; IR:  $\nu$  = 3038, 2907, 2883, 2742, 1685, 1598, 1490, 1243, 1046, 830, 749  $\text{cm}^{-1}$ .

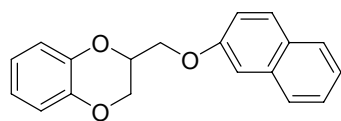

2-((naphthalen-2-yloxy)methyl)-2,3-dihydrobenzo[1,4]dioxine (**3k**): White solid, m.p. 80-81 $^{\circ}\text{C}$ ;  $^1\text{H}$  NMR (400MHz,  $\text{CDCl}_3$ ):  $\delta$  7.81-7.74 (m, 3H), 7.48 (t,  $J$  = 7.6Hz, 1H), 7.39 (t,  $J$  = 7.6Hz, 1H), 7.26-7.19 (m, 2H), 7.00-6.95 (m, 2H), 6.93-6.90 (m, 2H), 4.67-4.63 (m, 1H), 4.48-4.45 (m, 1H), 4.39 (dd,  $J$  = 4.8, 10.0 Hz, 1H), 4.31-4.26 (m, 2H);  $^{13}\text{C}$  NMR (100 MHz,  $\text{CDCl}_3$ ):  $\delta$  156.23, 143.18, 142.92, 134.39, 129.59, 129.23, 127.67, 126.82, 126.53, 123.96, 121.81, 121.56, 118.63, 117.46, 117.30, 106.91, 71.36, 66.33, 65.34; IR:  $\nu$  = 3051, 2977, 2919, 1593, 1492, 1250, 1055, 848, 747  $\text{cm}^{-1}$ ; EI-MS:  $m/z$  = 292( $\text{M}^+$ ); HRMS (EI) calcd for  $\text{C}_{19}\text{H}_{16}\text{O}_3$  292.1099, found 292.1105.

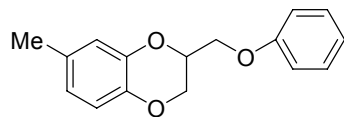

7-methyl-2-(phenoxy)methyl-2,3-dihydrobenzo[1,4]dioxine (**3I**):

White solid, m.p. 55-56°C<sup>3</sup>; <sup>1</sup>H NMR (400MHz, CDCl<sub>3</sub>): δ 7.33 (t, *J* = 8.0Hz, 2H), 7.02 (t, *J* = 7.2 Hz, 1H), 6.96 (d, *J* = 8.0 Hz, 2H), 6.82 (d, *J* = 8.4 Hz, 1H), 6.78 (s, 1H), 6.69 (d, *J* = 8.0 HZ, 1H), 4.59-4.55 (m, 1H), 4.40 (dd, *J* = 2.0, 11.2 Hz, 1H), 4.29-4.15 (m, 3H), 2.29 (s, 3H); <sup>13</sup>C NMR (100 MHz, CDCl<sub>3</sub>): δ 158.29, 142.44, 140.86, 131.42, 129.54, 122.06, 121.35, 117.70, 116.85, 114.55, 71.37, 66.22, 65.29, 20.66; IR: ν = 3103, 2973, 2921, 2875, 1588, 1499, 1239, 1053, 800, 750 cm<sup>-1</sup>.

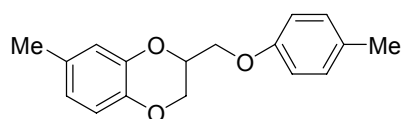

7-methyl-2-(p-tolylloxymethyl)-2,3-dihydrobenzo[1,4]dioxine

(**3m**): White solid, m.p. 80-81°C; <sup>1</sup>H NMR (400MHz, CDCl<sub>3</sub>): δ 7.12 (d, *J* = 8.4 Hz, 2H), 6.86 (d, *J* = 8.4Hz, 2H), 6.81 (d, *J* = 7.2 Hz, 1H), 6.77 (s, 1H), 6.68 (d, *J* = 8.0 Hz, 1H), 4.57-4.53 (m, 1H), 4.40-4.38 (m, 1H), 4.26-4.18 (m, 2H), 4.15-4.10 (m, 1H), 2.32 (s, 3H), 2.29 (s, 3H); <sup>13</sup>C NMR (100 MHz, CDCl<sub>3</sub>): δ 156.23, 142.48, 140.87, 131.39, 130.62, 129.96, 122.02, 117.71, 116.83, 114.43, 71.42, 66.45, 65.34, 20.66, 20.45; IR: ν = 3034, 2992, 2926, 2901, 2875, 1589, 1507, 1240, 1058, 842, 747 cm<sup>-1</sup>; EI-MS: *m/z* = 270(M<sup>+</sup>); HRMS (EI) calcd for C<sub>17</sub>H<sub>18</sub>O<sub>3</sub> 270.1256, found 270.1258.

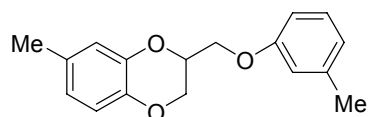

7-methyl-2-(m-tolylloxymethyl)-2,3-dihydrobenzo[1,4]dioxine

(**3n**): White solid, m.p. 50-51°C; <sup>1</sup>H NMR (400MHz, CDCl<sub>3</sub>): δ 7.21 (t, *J* = 7.6Hz, 1H), 6.83-6.81 (m, 2H), 6.78-6.76 (m, 3H), 6.69 (d, *J* = 8.0Hz, 1H), 4.58-4.56 (m, 1H), 4.41-4.38 (m, 1H), 4.28-4.19 (m, 2H), 4.17-4.13 (m, 1H), 2.37 (s, 3H), 2.29 (s, 3H); <sup>13</sup>C NMR (100 MHz, CDCl<sub>3</sub>): δ 158.29, 142.44, 140.85, 139.62, 131.41, 129.26, 122.16, 122.02, 117.70, 116.83, 115.37, 111.40, 71.36, 66.14, 65.30, 21.47, 20.65; IR: ν = 3034, 2951, 2921, 2879, 1583, 1506, 1255, 1060, 802, 767, 747 cm<sup>-1</sup>; EI-MS: *m/z* = 270(M<sup>+</sup>); HRMS (EI) calcd for C<sub>17</sub>H<sub>18</sub>O<sub>3</sub> 270.1256, found 270.1253.

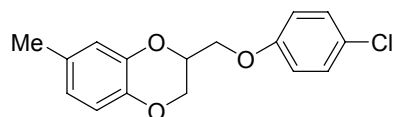

2-((4-chlorophenoxy)methyl)-7-methyl-2,3-dihydrobenzo[1,4]

dioxine (**3o**): White solid, m.p. 84-85°C;  $^1\text{H}$  NMR (400MHz,  $\text{CDCl}_3$ ):  $\delta$  7.25 (d,  $J = 8.8$  Hz, 2H), 6.86 (d,  $J = 8.8$ Hz, 2H), 6.79 (d,  $J = 8.4$ Hz, 1H), 6.74 (s, 1H), 6.67 (d,  $J = 8.0$ Hz, 1H), 4.56-4.52 (m, 1H), 4.36 (m, 1H), 4.23-4.17 (m, 2H), 4.12 (dd,  $J = 6.4, 9.8$ Hz, 1H), 2.26 (s, 3H);  $^{13}\text{C}$  NMR (100 MHz,  $\text{CDCl}_3$ ):  $\delta$  156.90, 142.29, 140.82, 131.51, 129.39, 126.29, 122.11, 117.67, 116.85, 115.84, 71.25, 66.61, 65.10, 20.63; IR:  $\nu = 3053, 2958, 2928, 2867, 1590, 1492, 1242, 1012, 822, 748$   $\text{cm}^{-1}$ ; EI-MS:  $m/z = 290(\text{M}^+)$ ; HRMS (EI) calcd for  $\text{C}_{16}\text{H}_{15}\text{ClO}_3$  290.0710, found 290.0710.

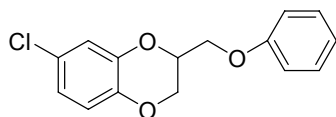

7-chloro-2-(phenoxymethyl)-2,3-dihydrobenzo[1,4]dioxine (**3p**):

Oil;  $^1\text{H}$  NMR (400MHz,  $\text{CDCl}_3$ ):  $\delta$  7.31 (t,  $J = 7.6$ Hz, 2H), 7.00 (t,  $J = 7.2$  Hz, 1H), 6.94-6.92 (m, 3H), 6.83 (br, 2H), 4.58-4.53 (m, 1H), 4.41-4.39 (m, 1H), 4.27-4.19 (m, 2H), 4.16-4.12 (m, 1H);  $^{13}\text{C}$  NMR (100 MHz,  $\text{CDCl}_3$ ):  $\delta$  158.12, 143.40, 141.91, 129.59, 126.13, 121.50, 121.48, 118.03, 117.49, 114.49, 71.44, 65.97, 65.23; IR:  $\nu = 3072, 2981, 2926, 2882, 1585, 1487, 1237, 1031, 802, 752$   $\text{cm}^{-1}$ .

### C. References

1. S. Wagner, K. Kopka, M. P. Law, B. Riemann, V. W. Pike, O. Schober, M. Schäfers, *Bioorg. Med. Chem.* **2004**, *12*, 4117.
2. L. Juha'sz, T. Docsa, A. Brunya'szki, P. Gergely and S. Antus, *Bioorg. Med. Chem.* **2007**, *15*, 4048.
3. W. L. Bao, Y.Y. Liu, X. Lv and W. X. Qian, *Org. Lett.* **2008**, *10*, 3899.

### D. Copies of $^1\text{H}$ NMR and $^{13}\text{C}$ NMR spectra

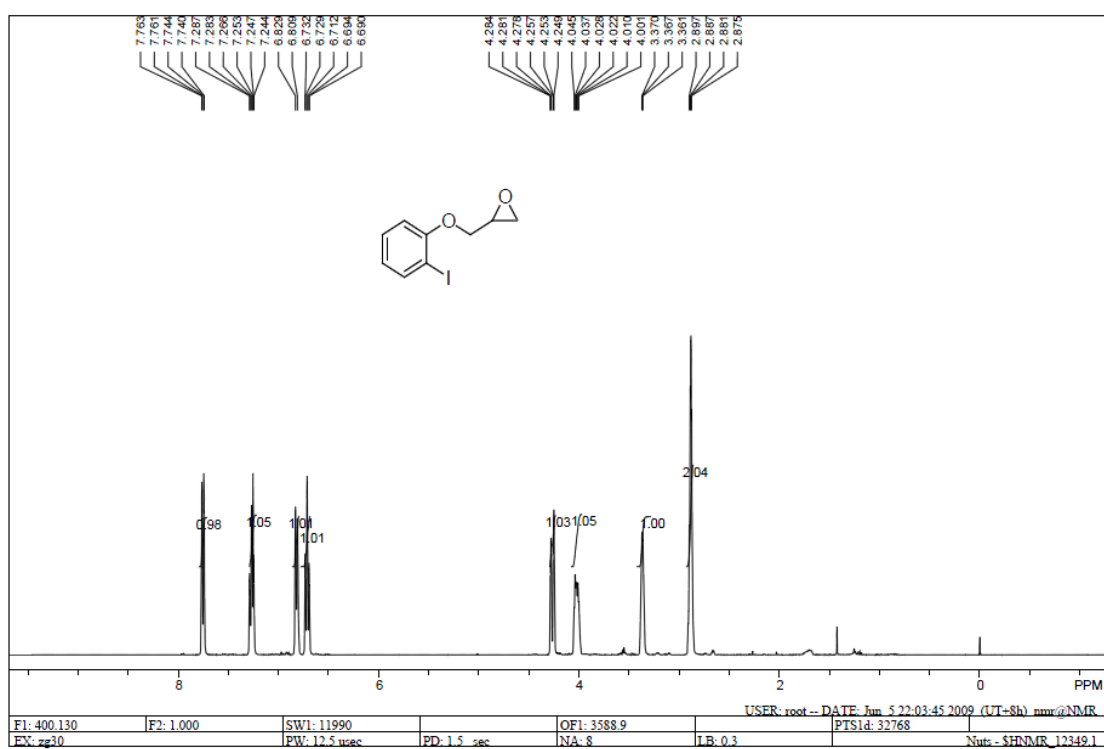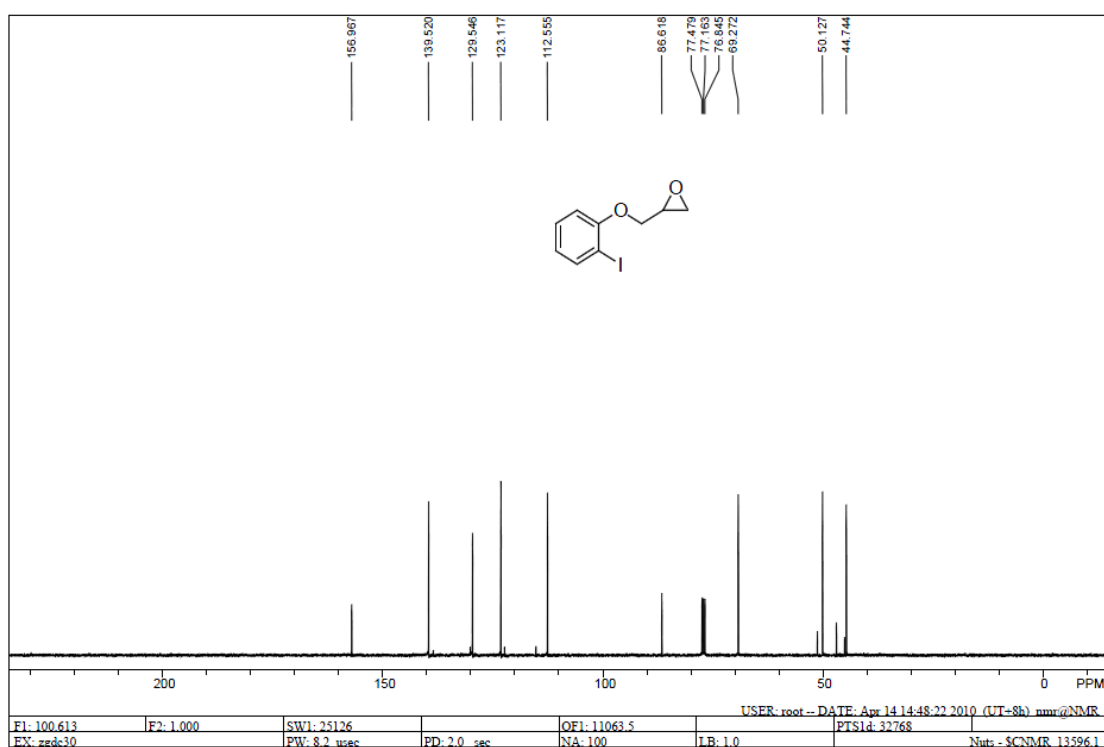



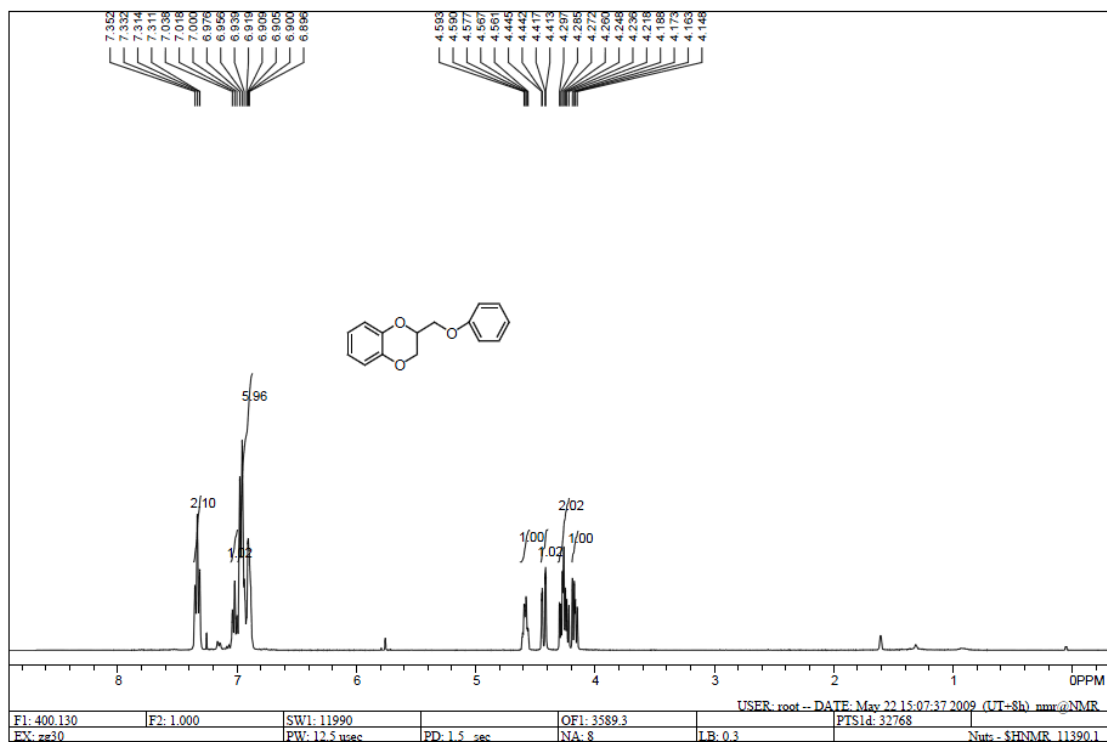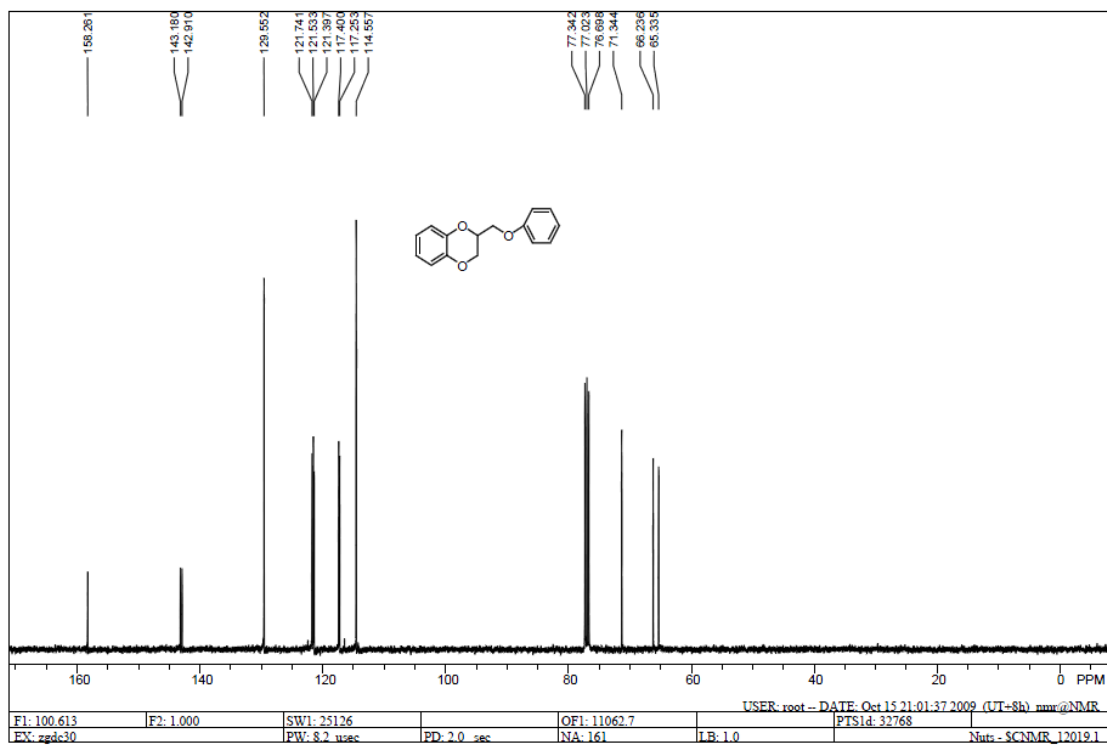

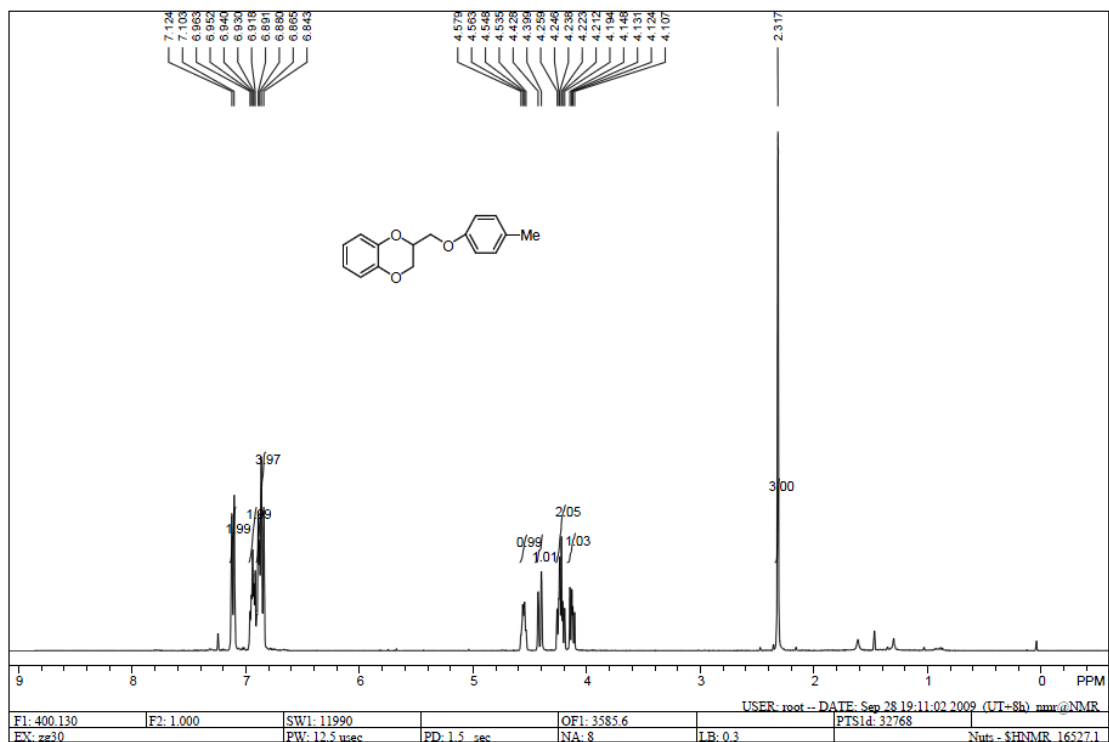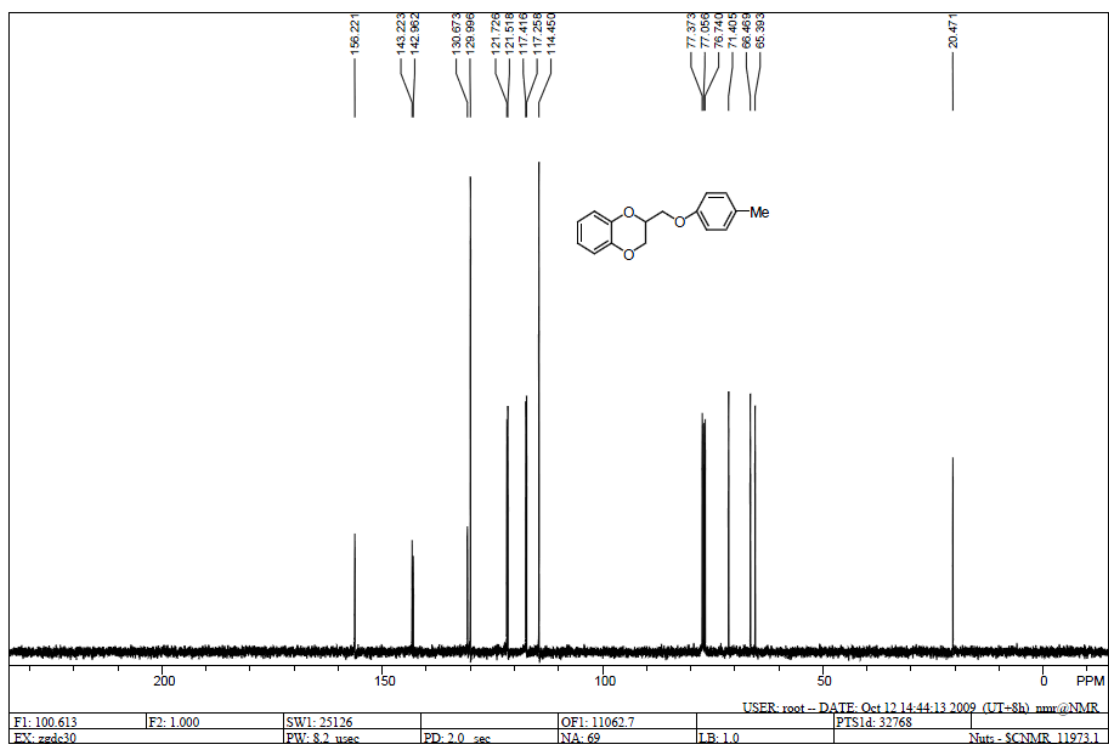

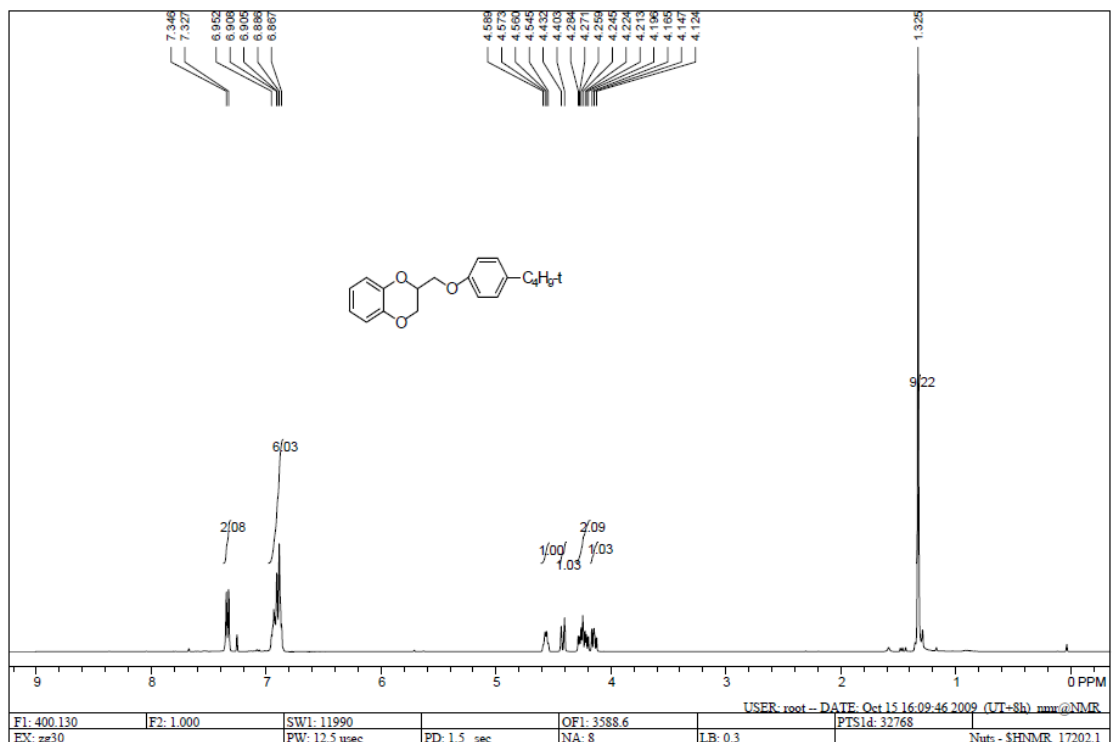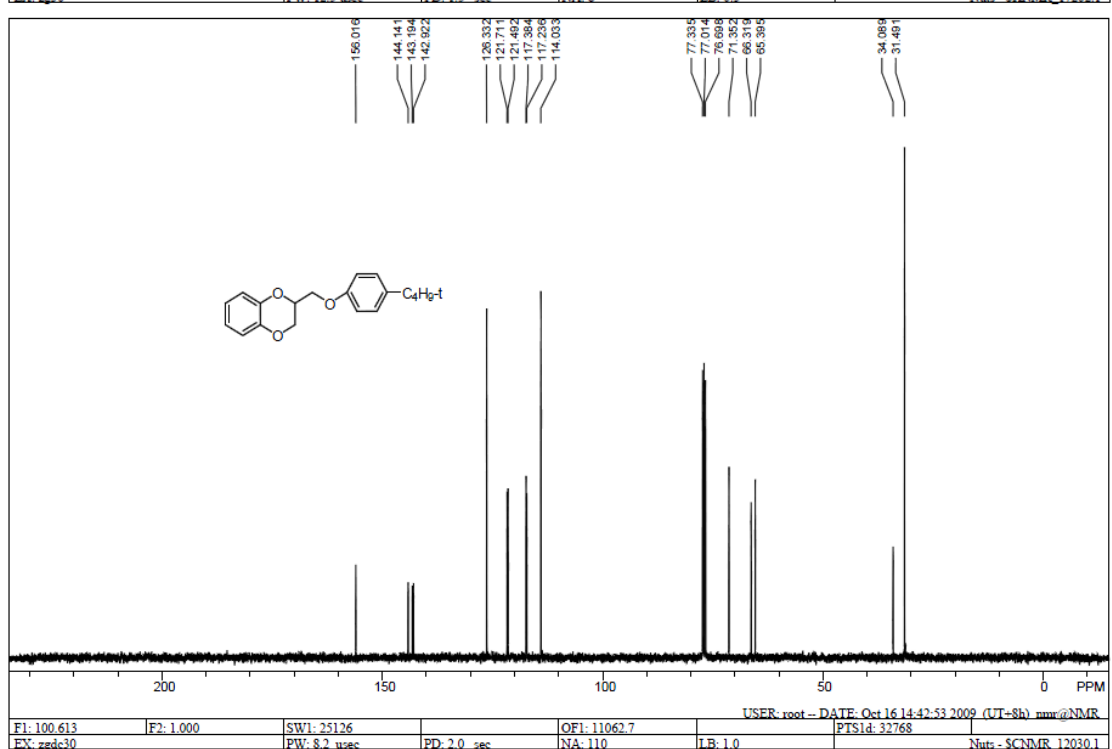

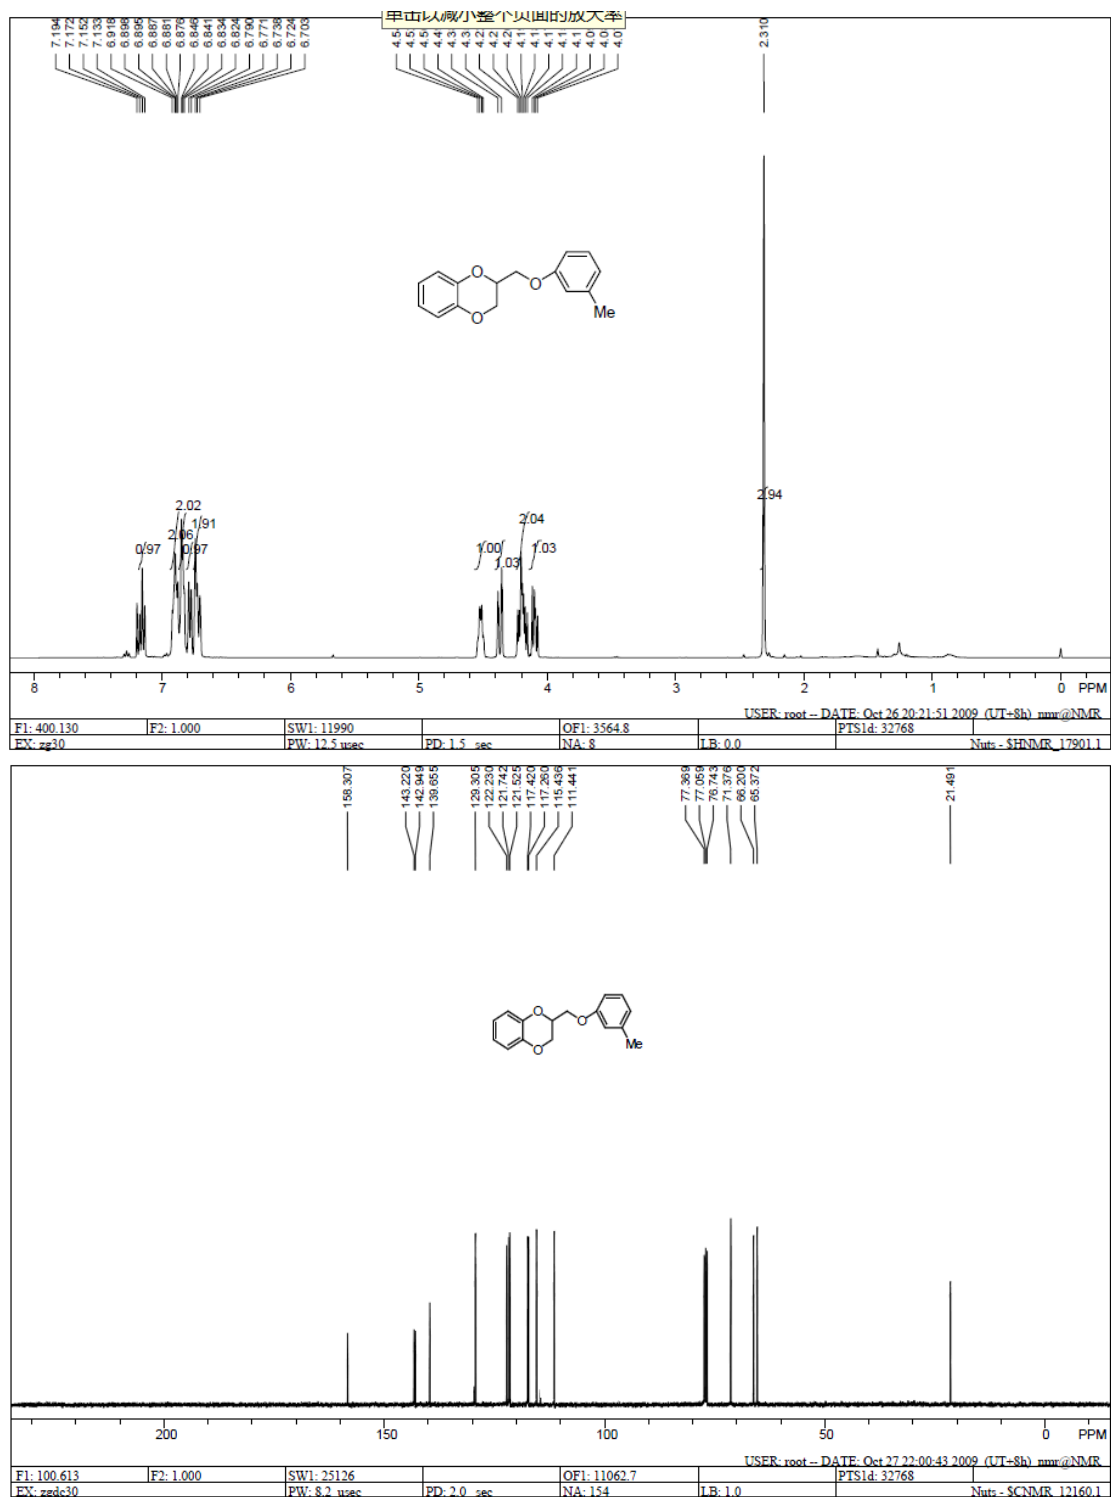

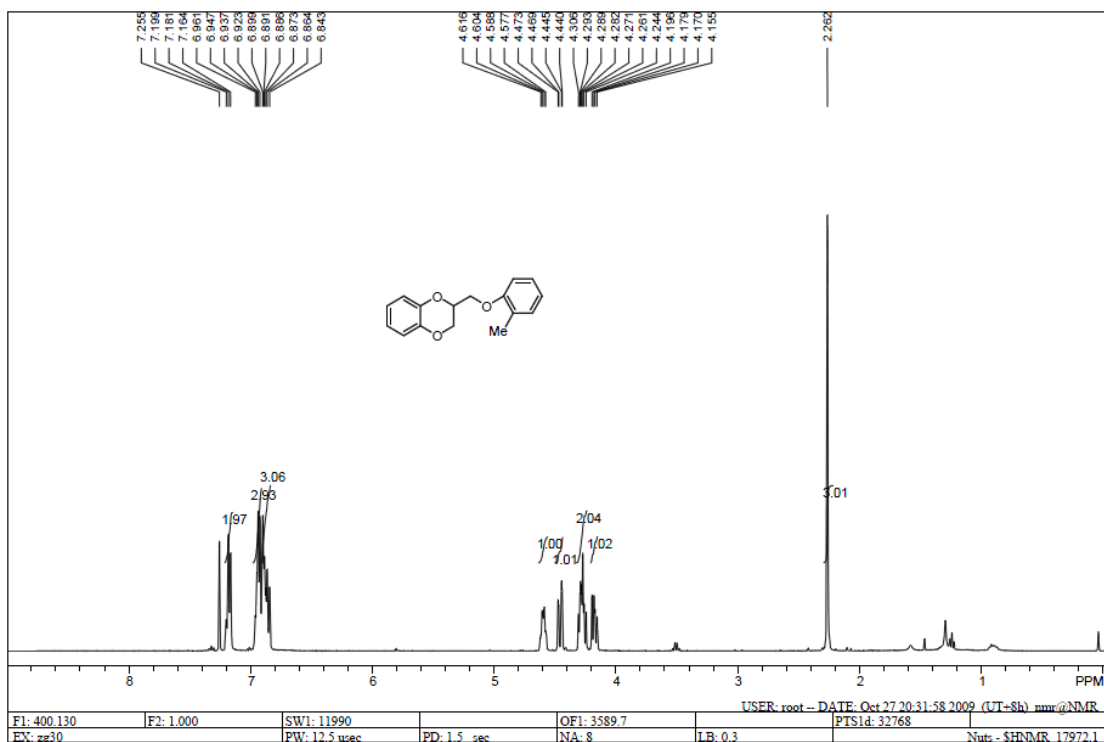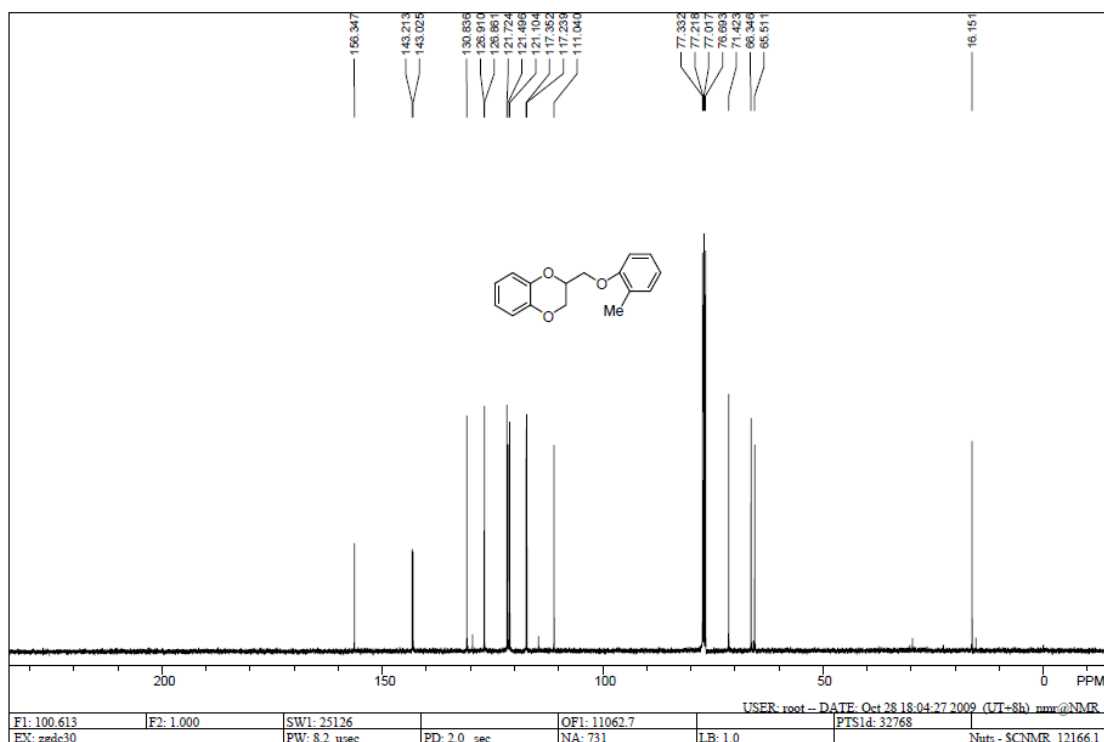

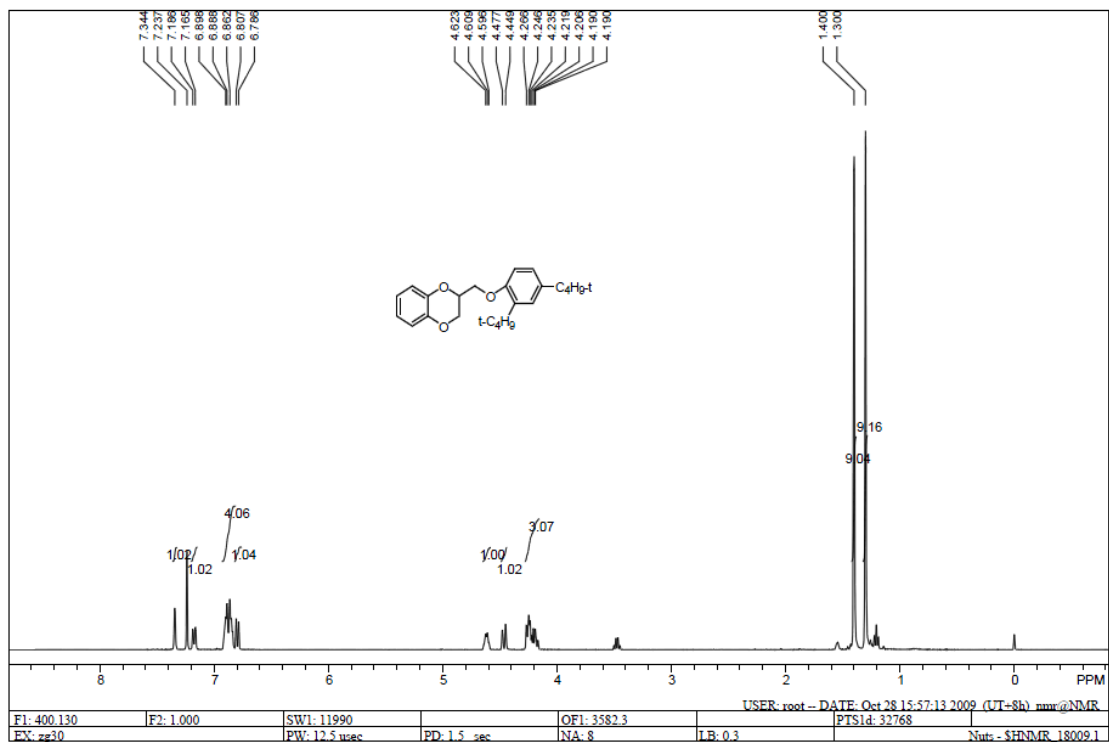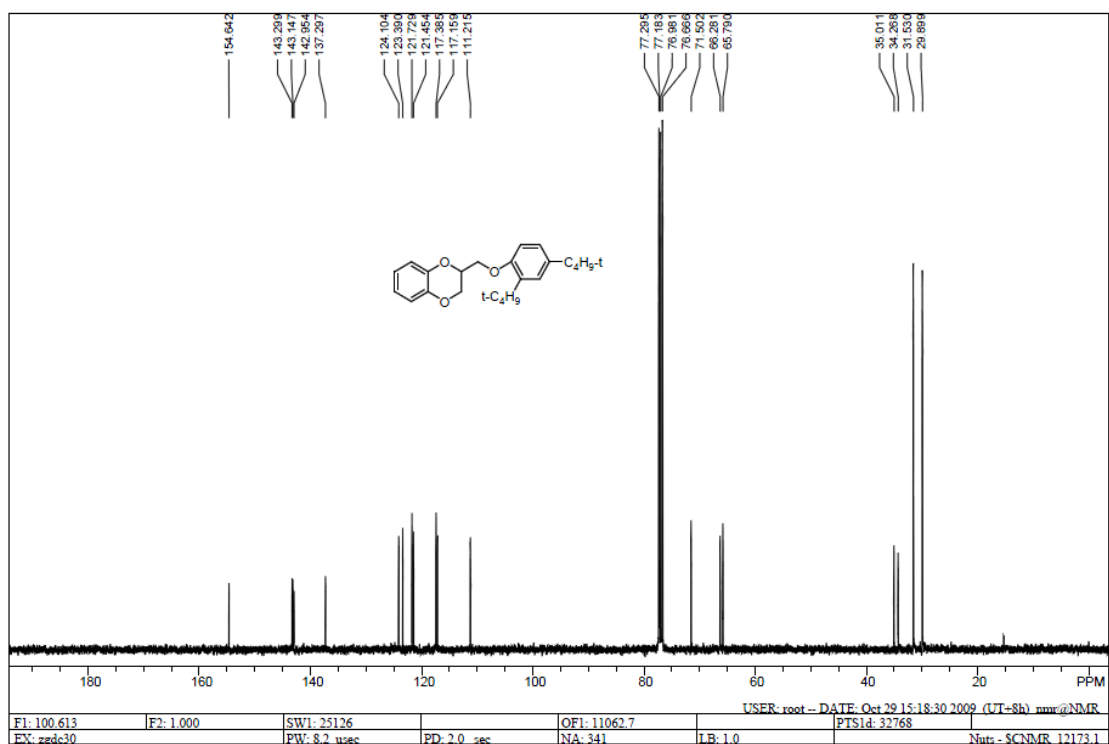

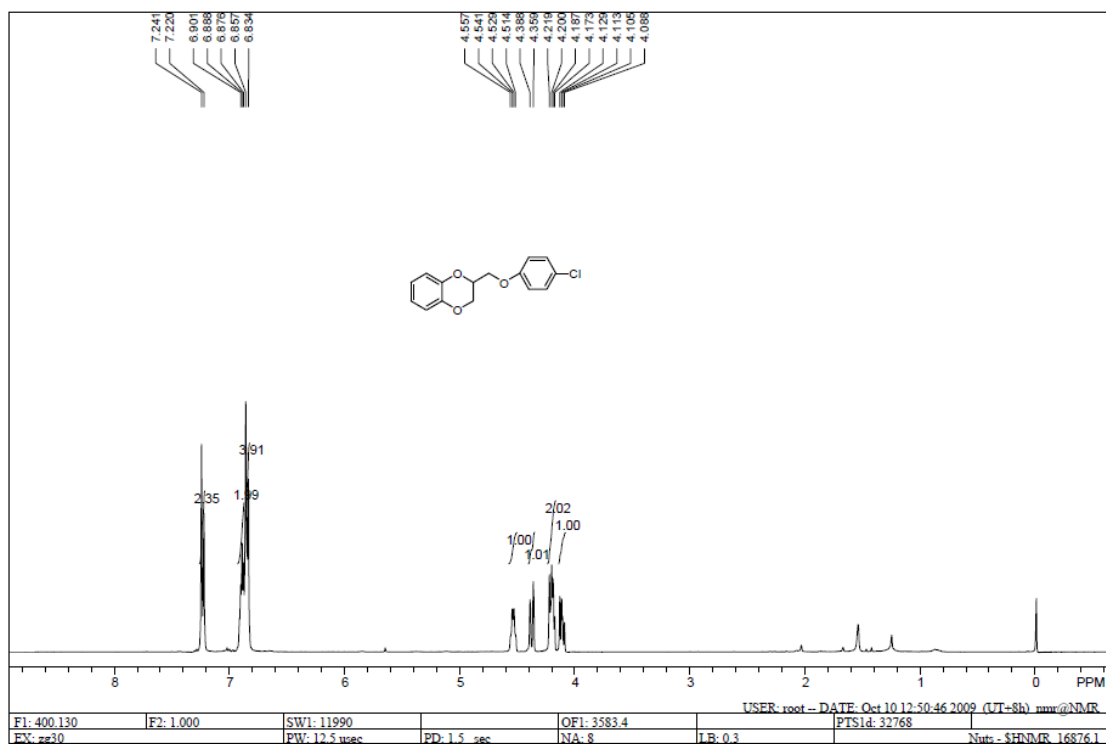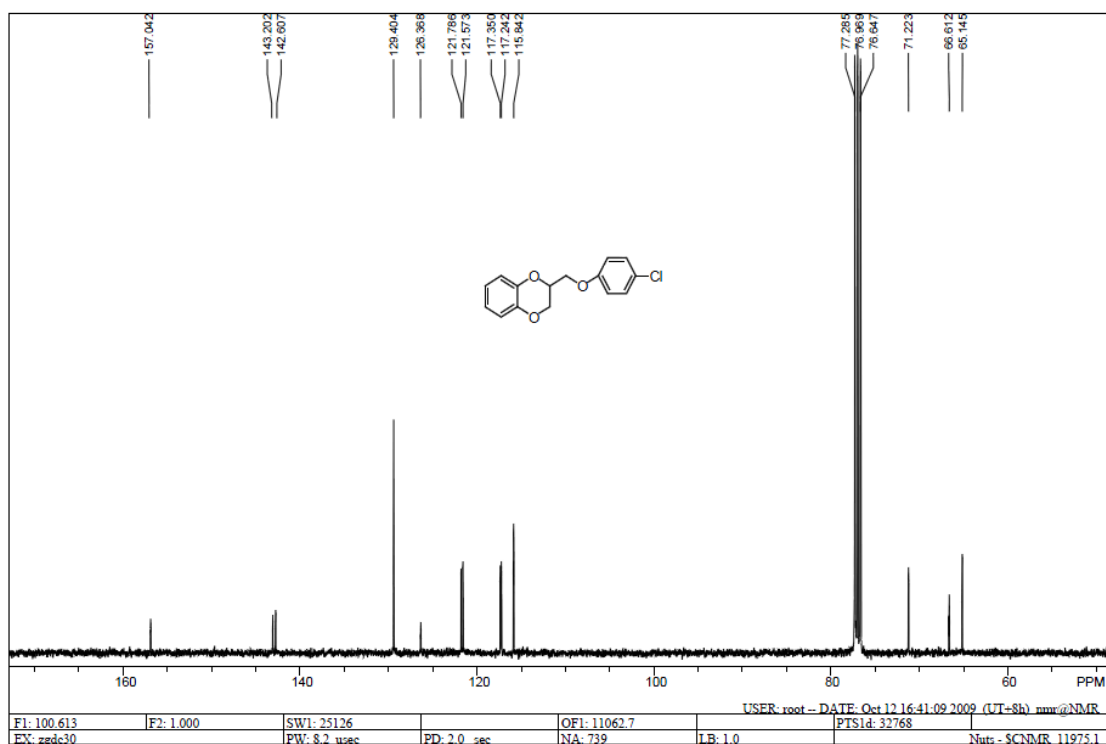

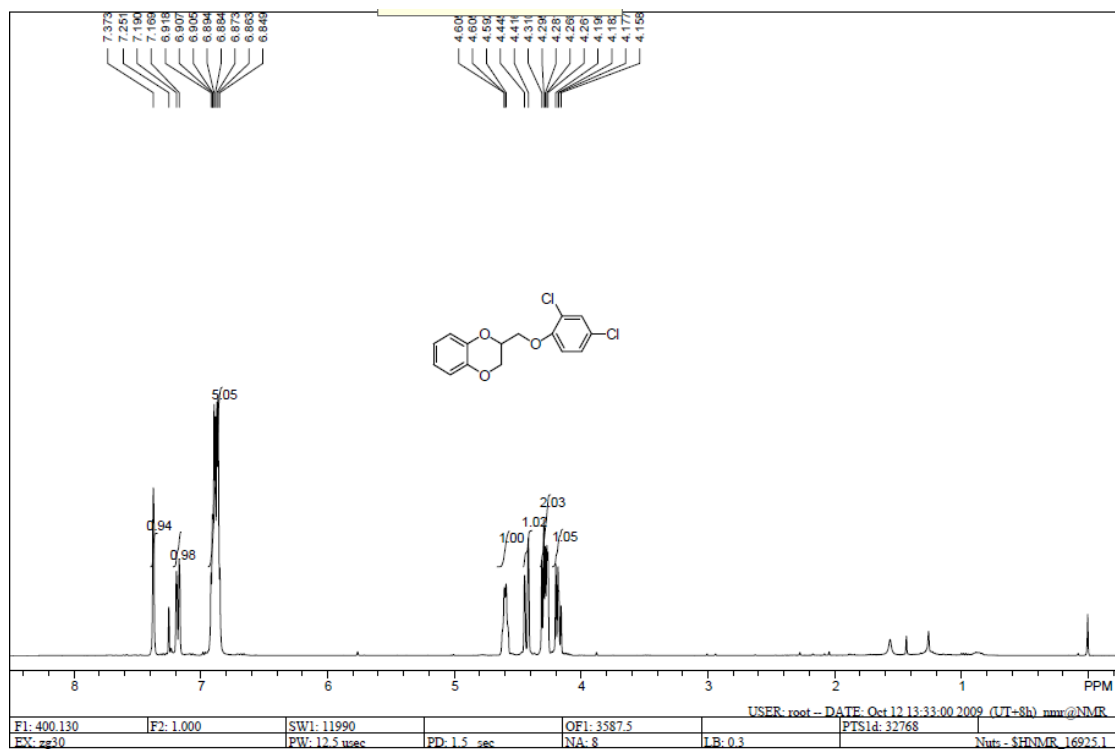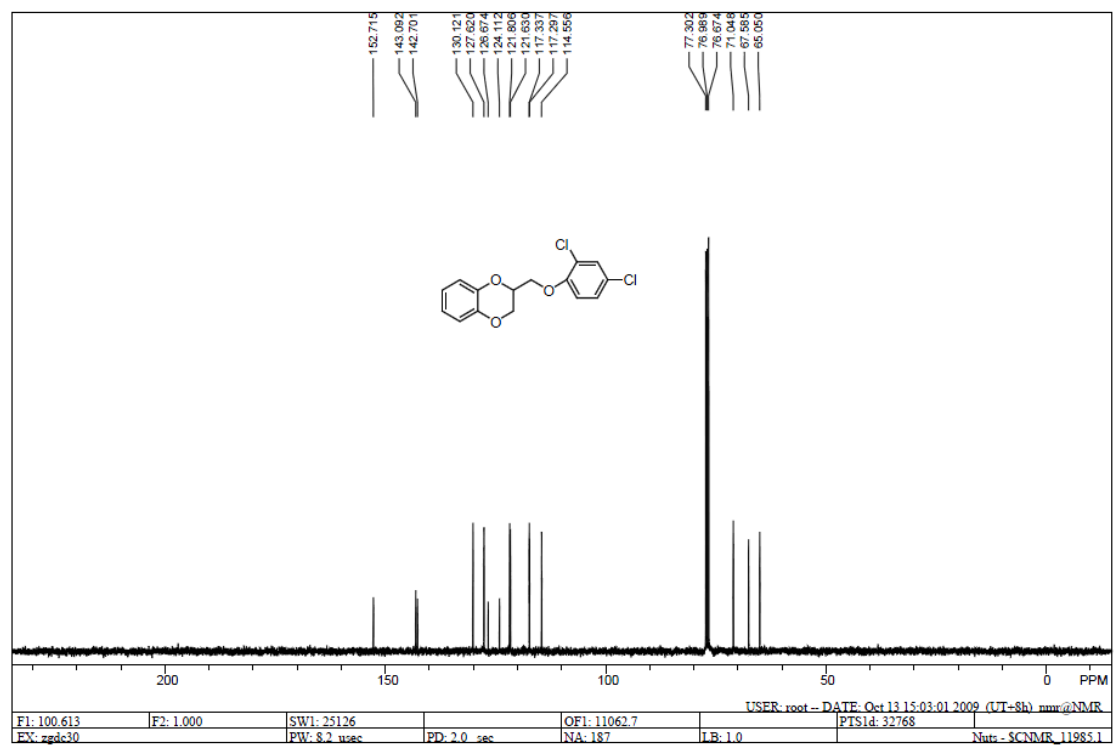



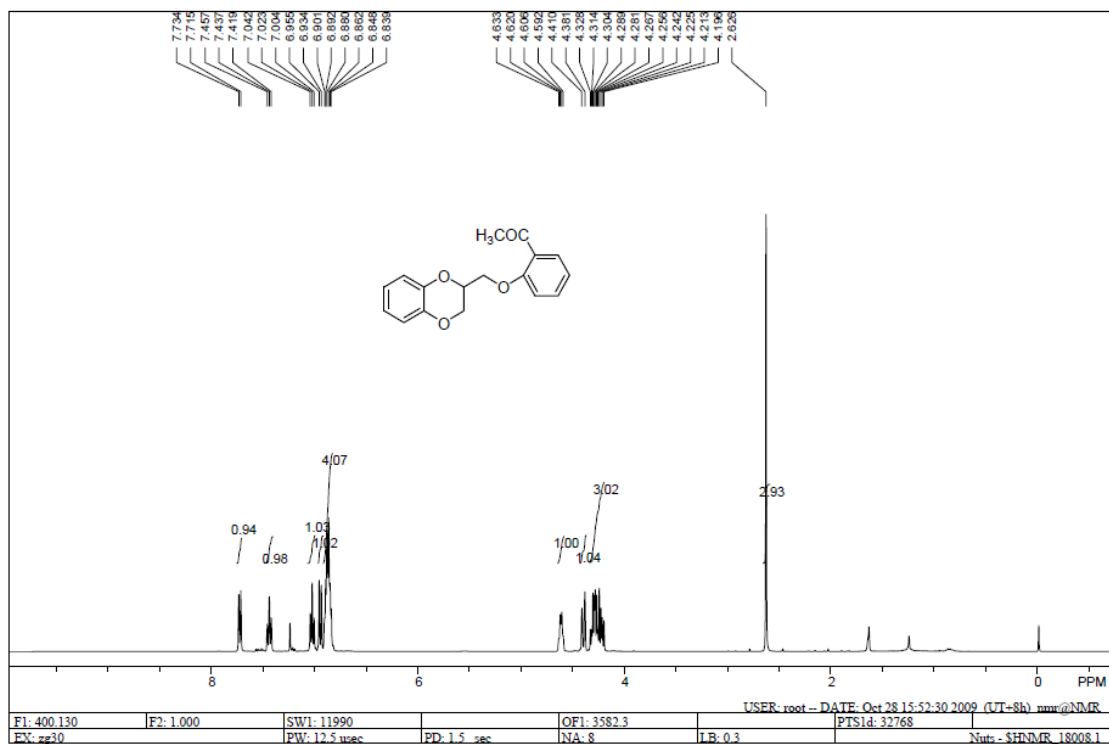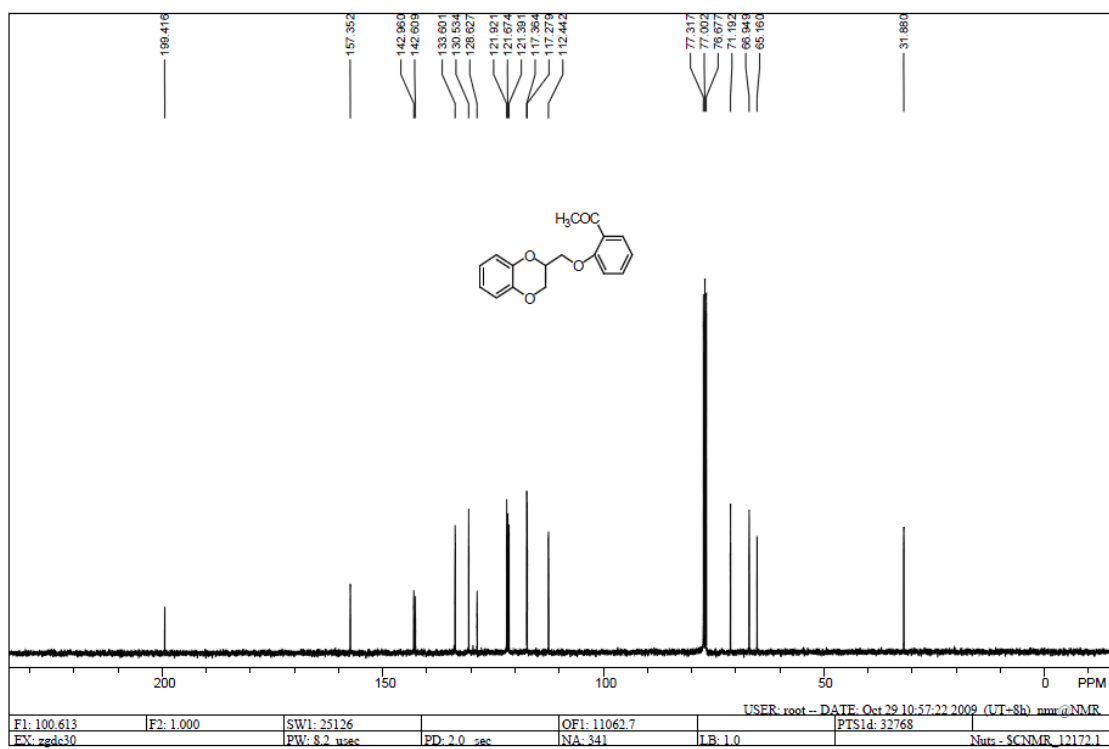

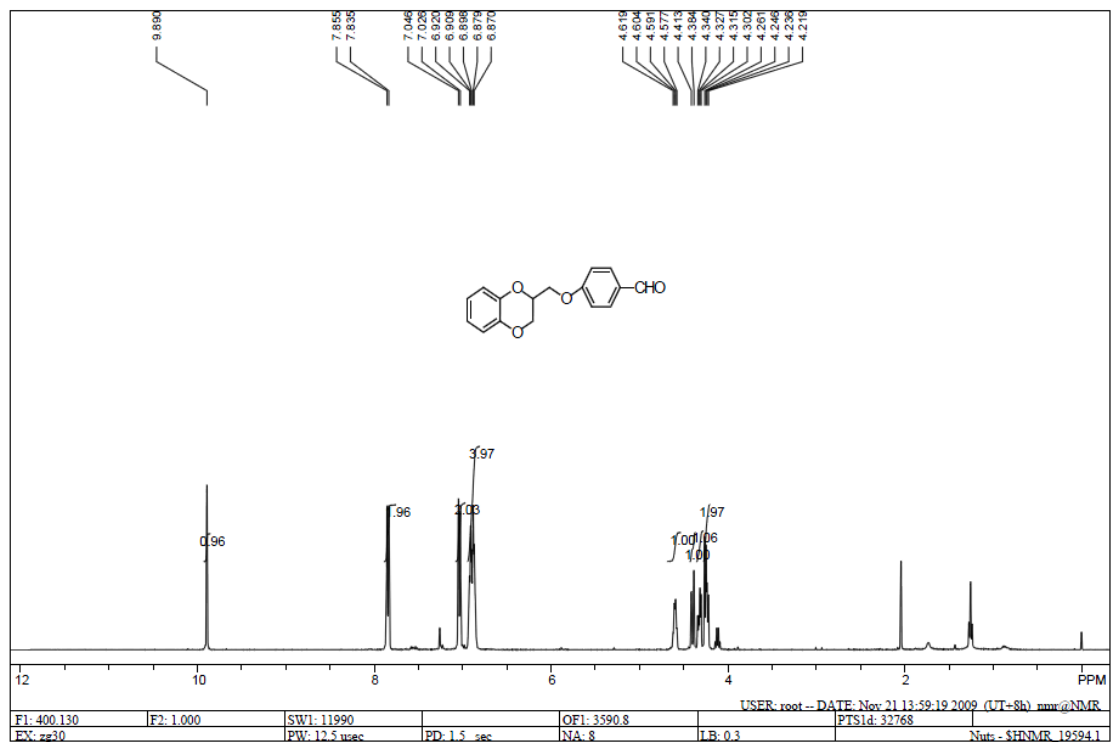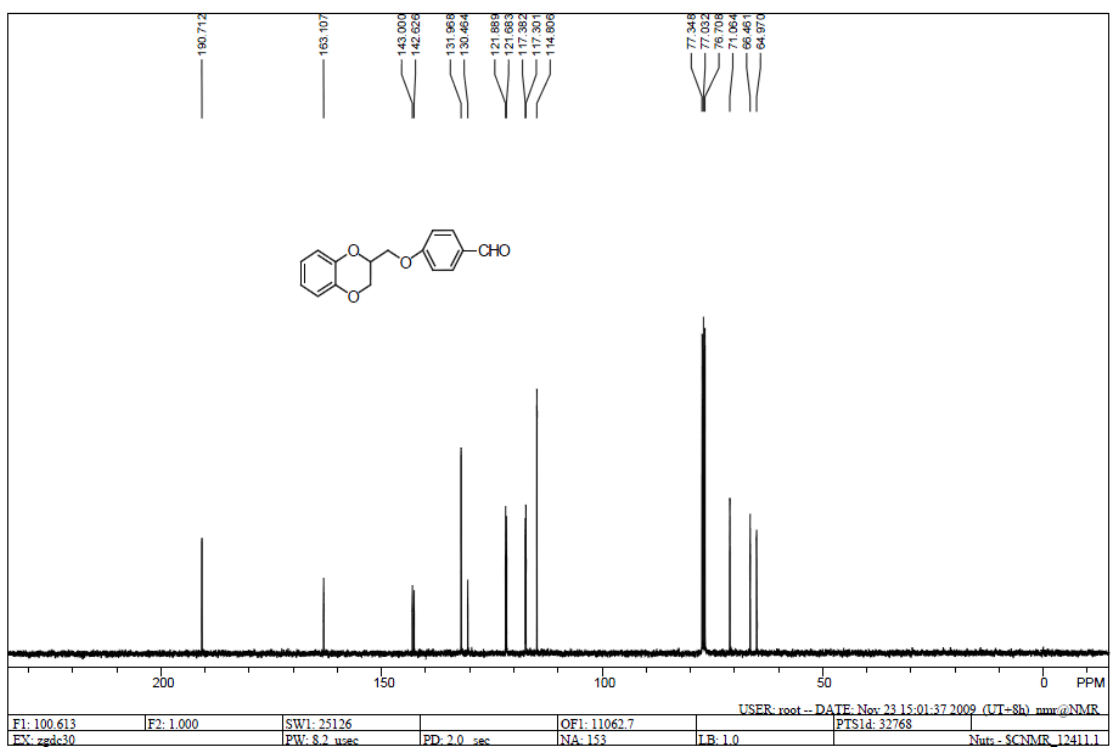

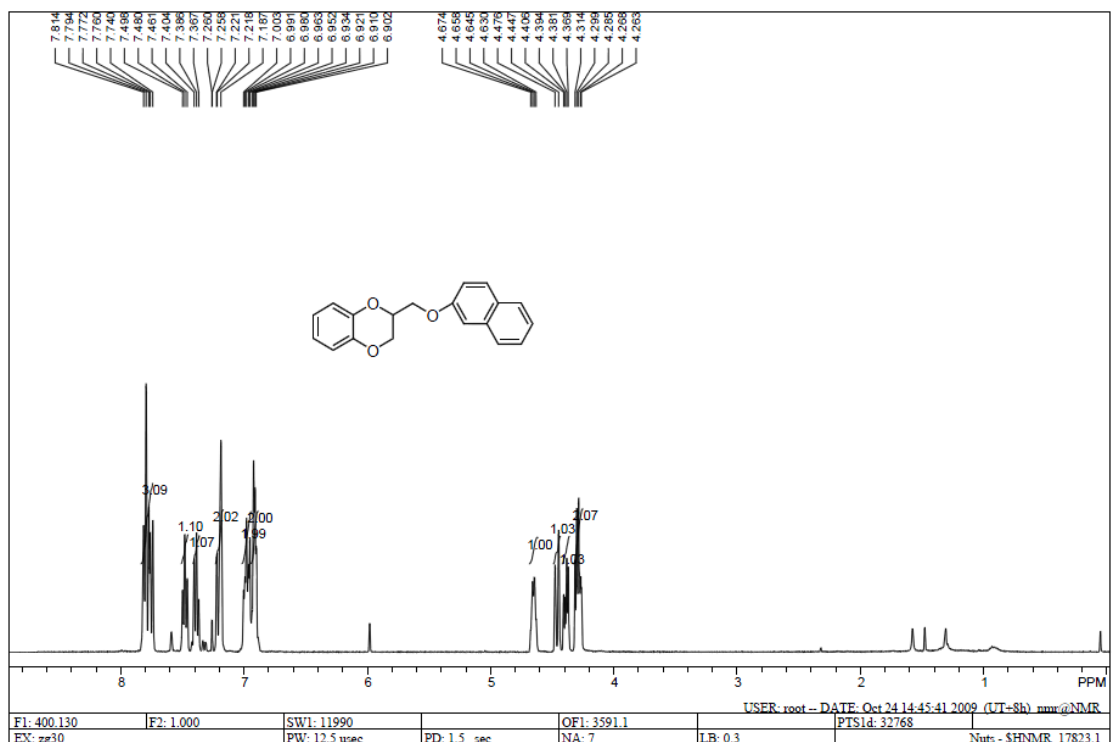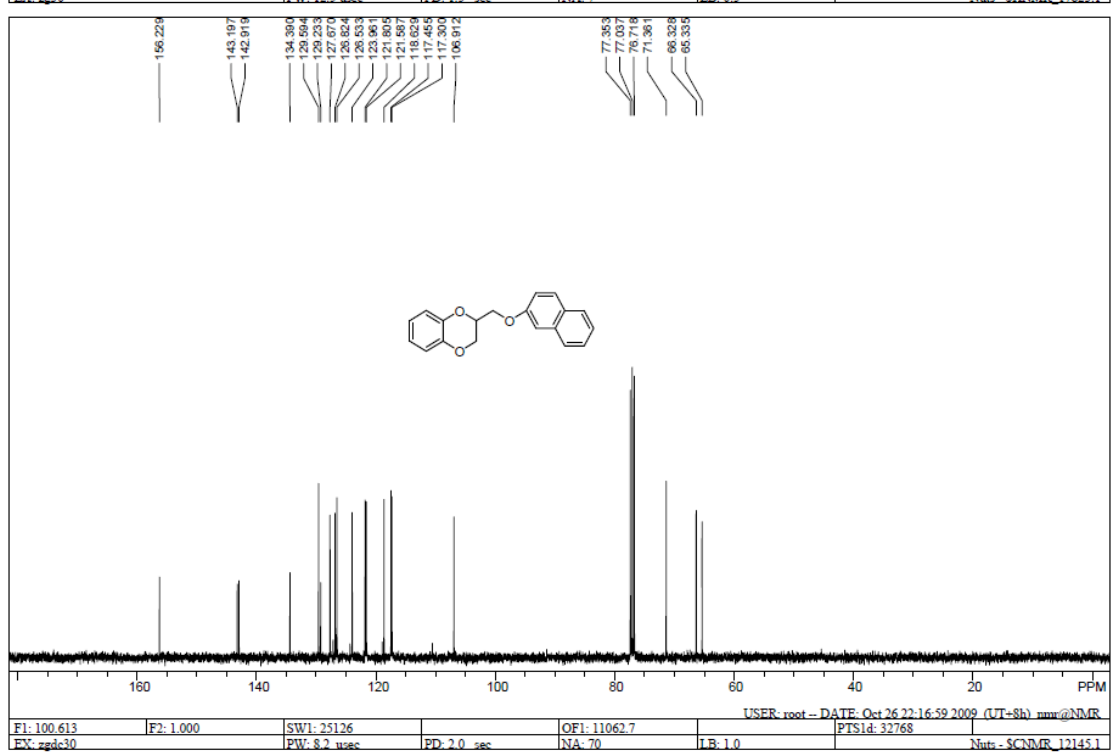

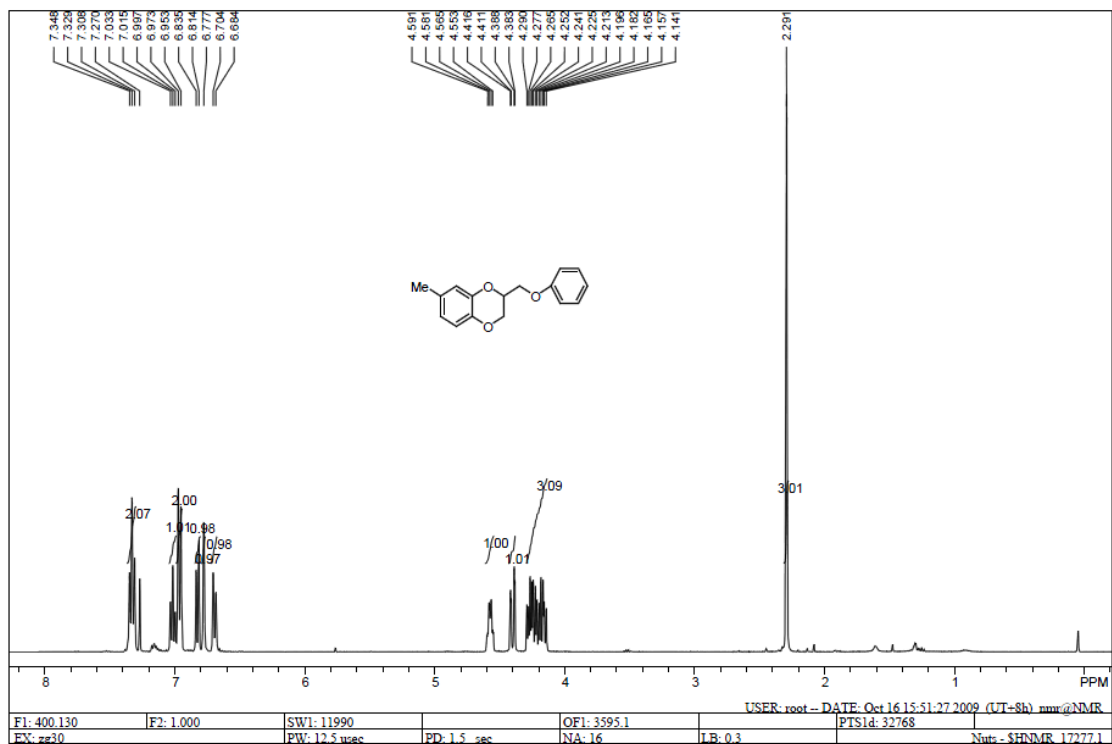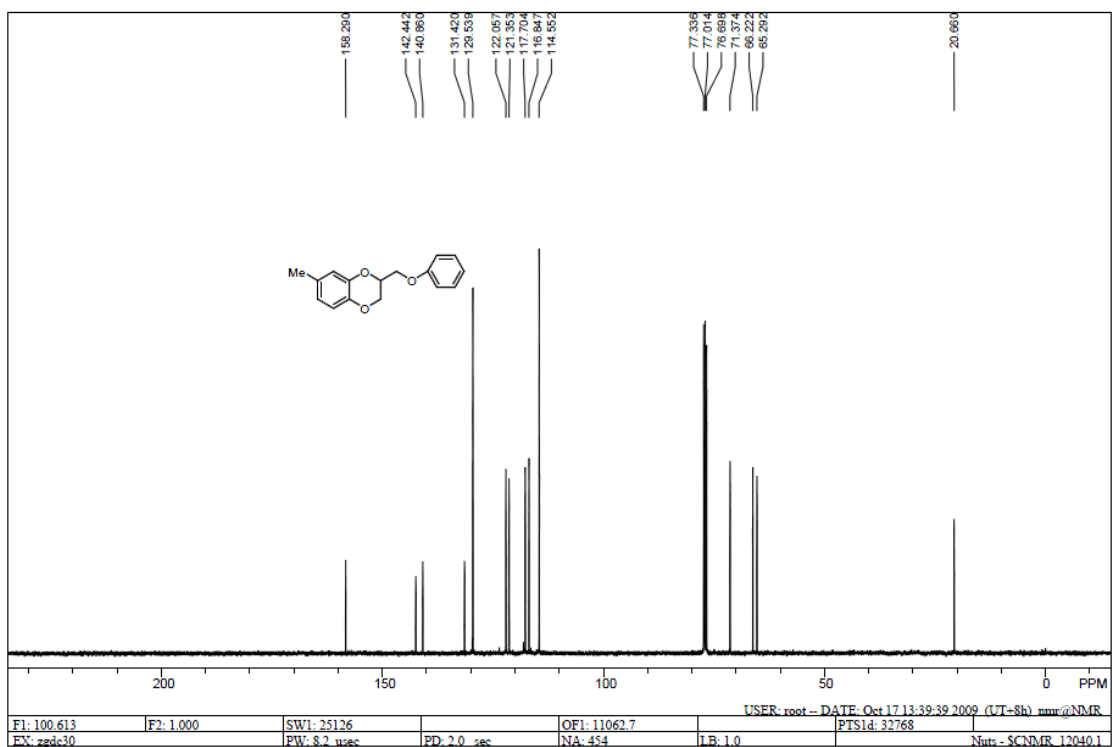

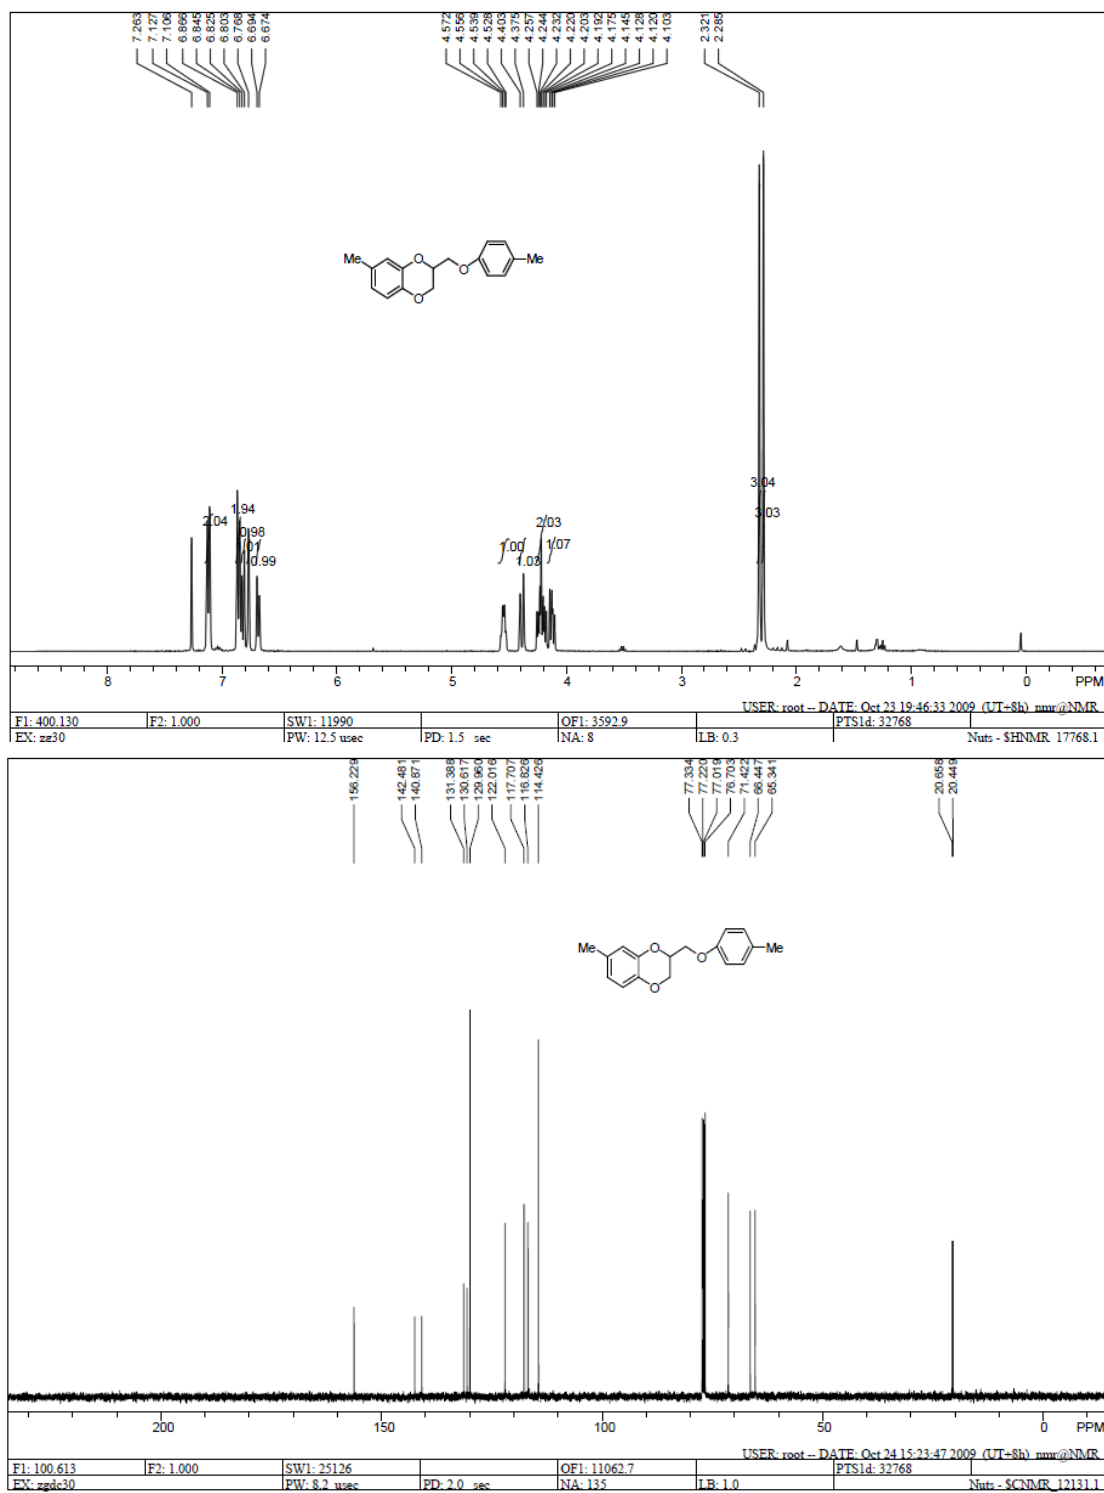

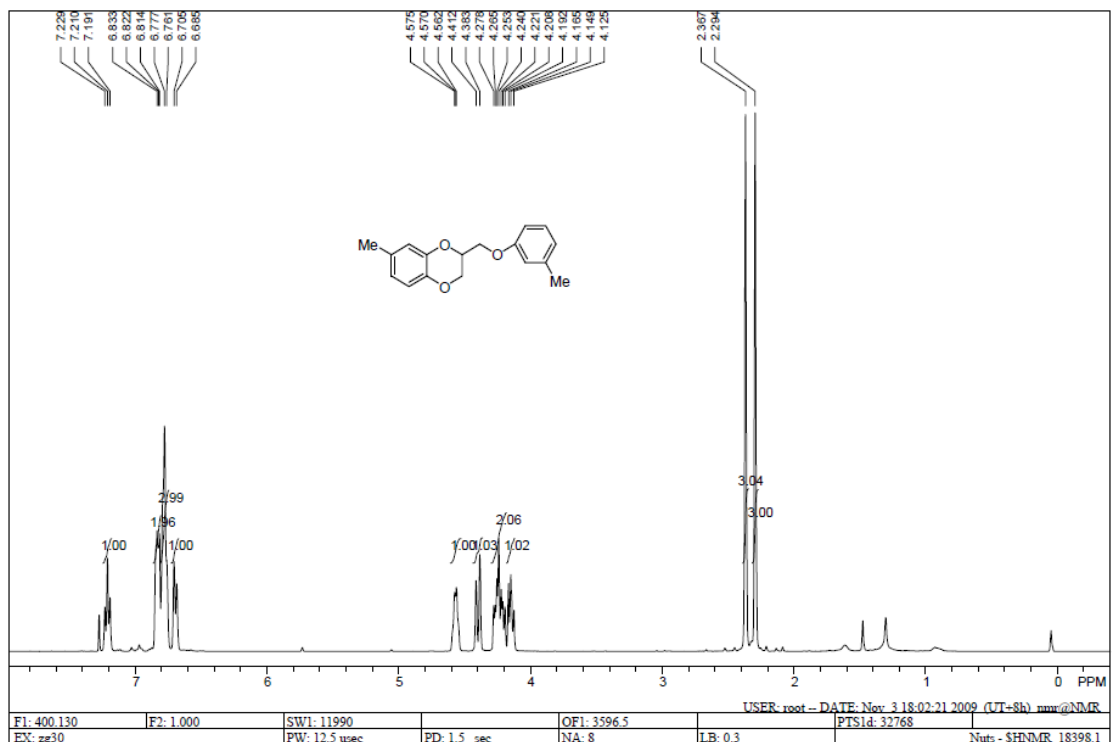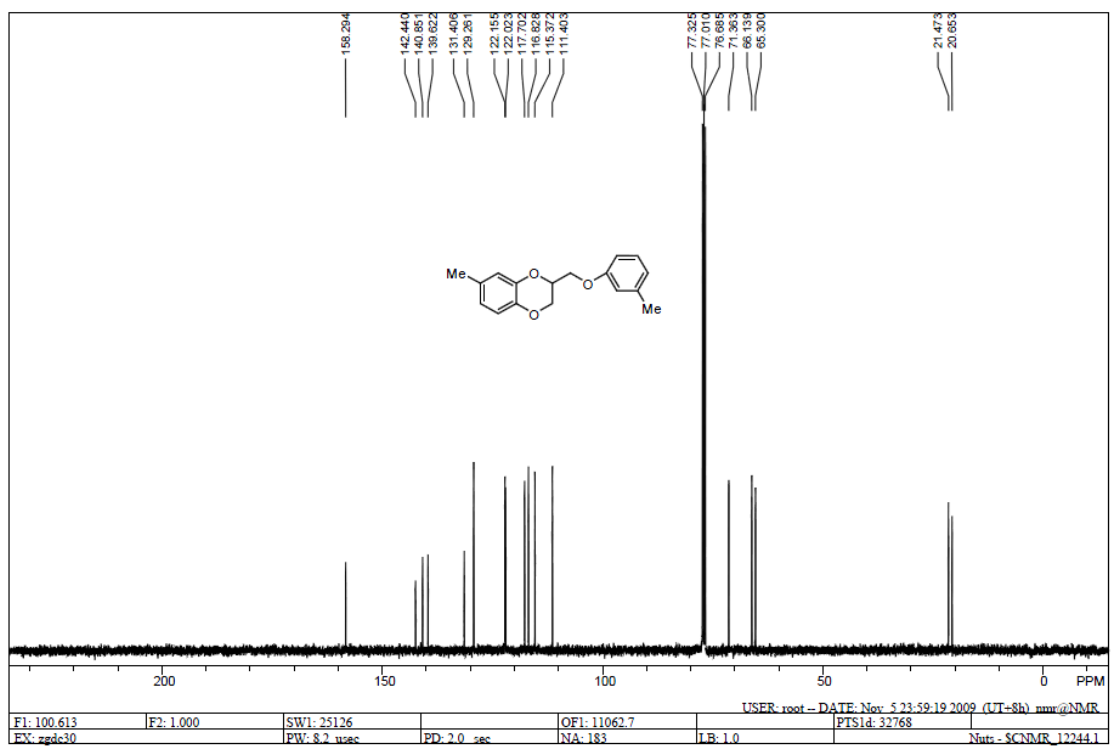

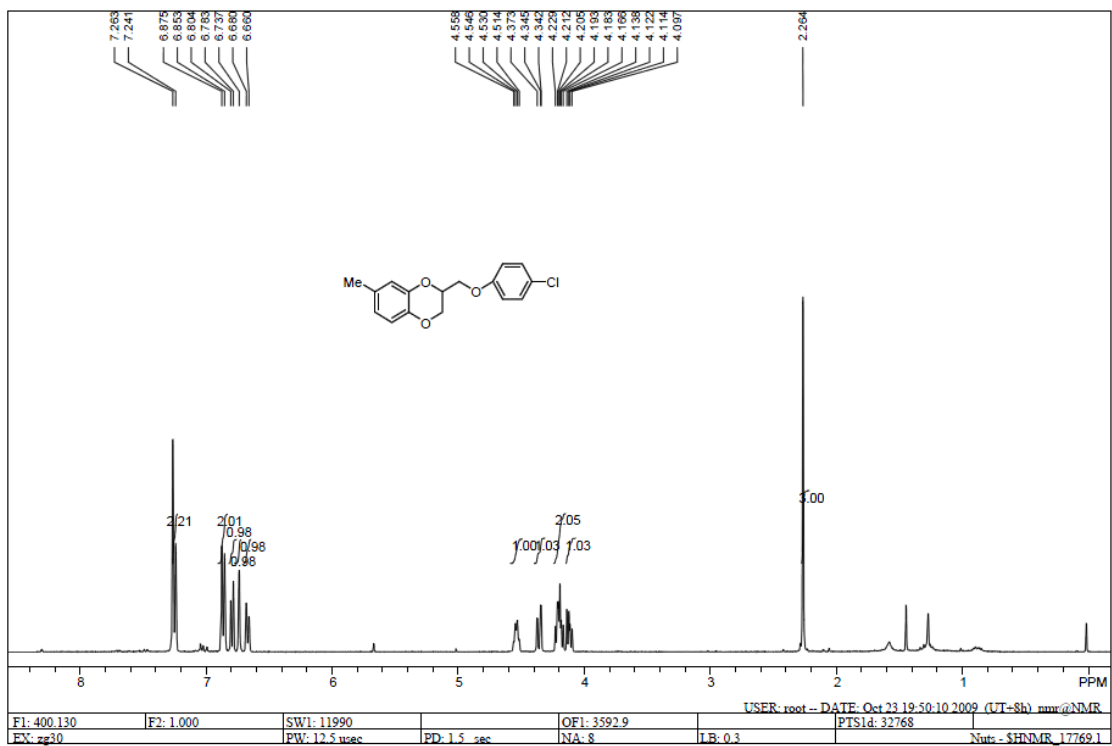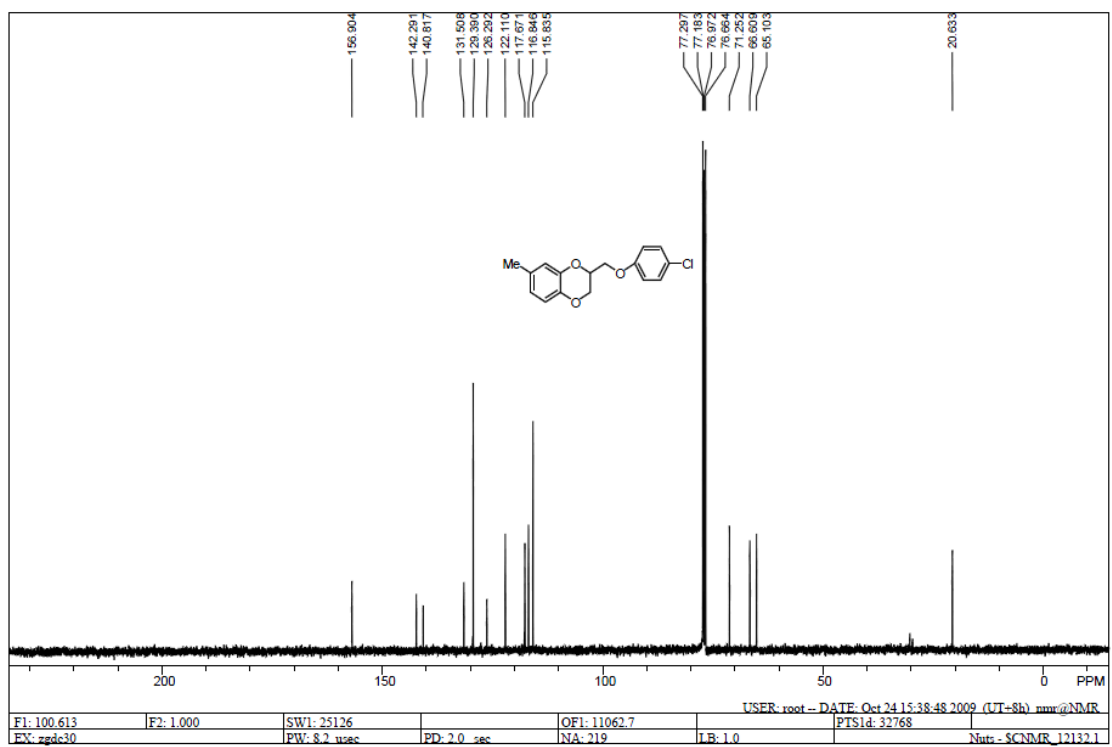

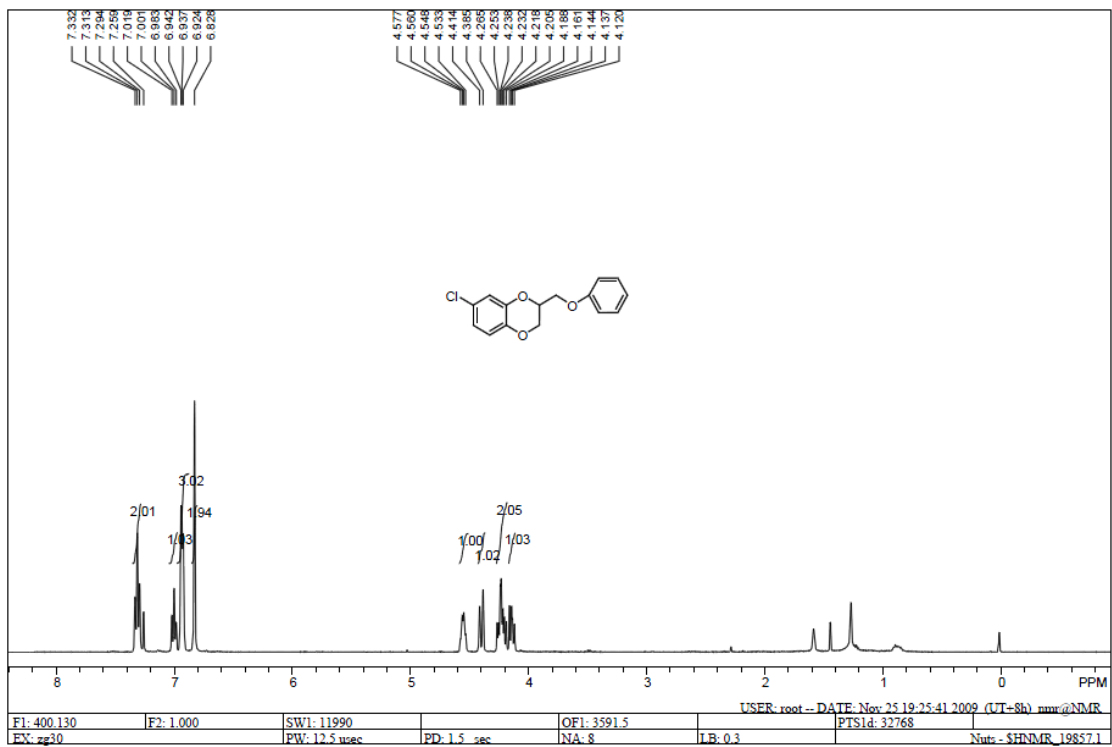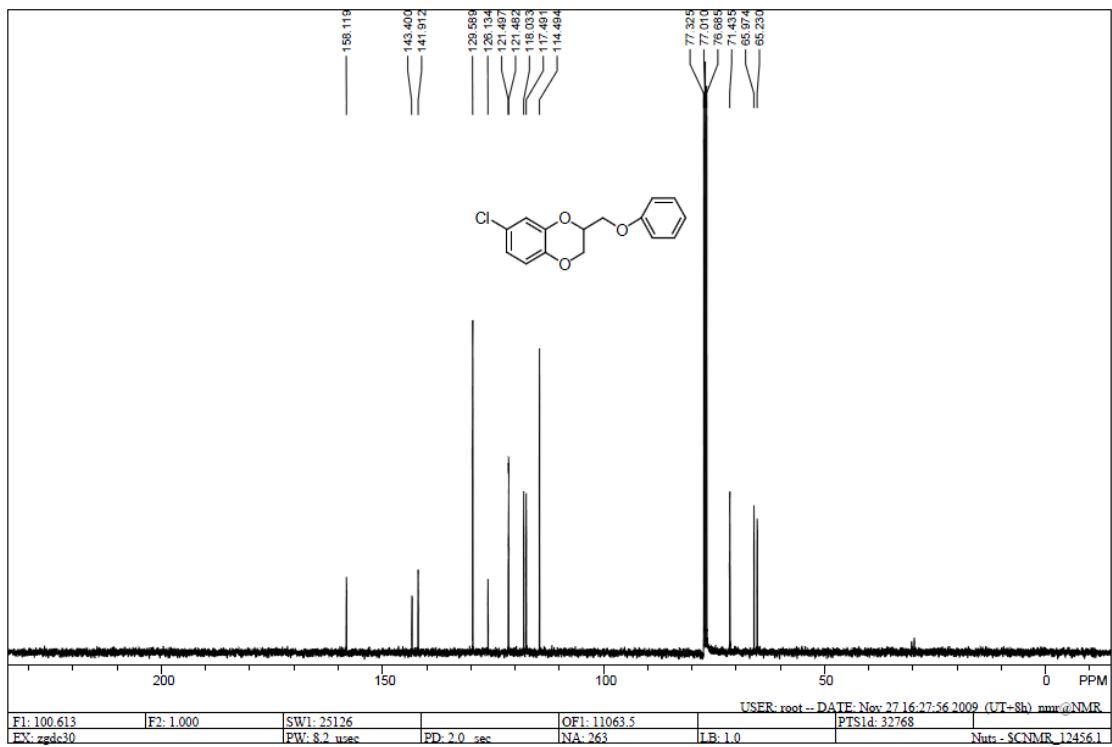

Supplement: c003691a.pdf [file c003691a.pdf]
